# ATP synthase K<sup>+</sup>- and H<sup>+</sup>-flux drive ATP synthesis and enable mitochondrial K<sup>+</sup>-uniporter function

Magdalena Juhaszova,<sup>1,9</sup> Evgeny Kobrinsky,<sup>1,9</sup> Dmitry B. Zorov,<sup>1,5,9</sup> H. Bradley Nuss,<sup>1†</sup>  
Yael Yaniv,<sup>1‡</sup> Kenneth W. Fishbein,<sup>2</sup> Rafael de Cabo,<sup>3</sup> Lluís Montoliu,<sup>6</sup> Sandra B. Gabelli,<sup>4,7,8</sup> Miguel A.  
Aon,<sup>1</sup> Sonia Cortassa,<sup>1</sup> and Steven J. Sollott<sup>1,\*</sup>

<sup>1</sup>Laboratories of Cardiovascular Science and <sup>2</sup>Clinical Investigation, and <sup>3</sup>Translational Gerontology Branch, National Institute on Aging, NIH, and <sup>4</sup>Dept. Medicine, <sup>7</sup>Dept. Oncology, <sup>8</sup>Dept. Biophysics and Biophysical Chemistry, Johns Hopkins University School of Medicine, Baltimore, MD, USA

<sup>5</sup>A.N. Belozersky Institute of Physico-Chemical Biology, Lomonosov Moscow State University, Moscow, Russia

<sup>6</sup>Centro Nacional de Biotecnología, CSIC, Madrid, Spain

Present address:

<sup>†</sup>Center for Scientific Review, NIH, Bethesda, MD, USA

<sup>‡</sup>Biomedical Engineering Faculty, Technion-IIT, Haifa, Israel

<sup>9</sup> Co-first author

\* Correspondence: [sollotts@mail.nih.gov](mailto:sollotts@mail.nih.gov)

**Running title: ATP synthase K<sup>+</sup>- and H<sup>+</sup>-flux drive ATP synthesis**

Lead Contact:

Steven J. Sollott, M.D.

Chief, Cardioprotection Section

Laboratory of Cardiovascular Science

Biomedical Research Center, Suite 100

National Institute on Aging, NIH

251 Bayview Blvd

Baltimore, MD 21224-2816

USA

TEL: 410-558-8657

FAX: 410-558-8150

## Summary

ATP synthase ( $F_1F_o$ ) synthesizes daily our body's weight in ATP, whose production-rate can be transiently increased several-fold. Using purified mammalian  $F_1F_o$ -reconstituted proteoliposomes and isolated mitochondria, we show that  $F_1F_o$  utilizes both  $H^+$ - and  $K^+$ -transport (because of  $>10^6$ -fold  $K^+$  excess vs  $H^+$ ) to drive ATP synthesis with the  $H^+:K^+$  permeability of  $\sim 10^6:1$ .  $F_1F_o$  can be upregulated by endogenous survival-related proteins (Bcl-xL, Mcl-1) and synthetic molecules (diazoxide, pinacidil) to increase its chemo-mechanical efficiency via  $IF_1$ . Increasing  $K^+$ - and  $H^+$ -driven ATP synthesis enables  $F_1F_o$  to operate as a primary mitochondrial  $K^+$ -uniporter regulating energy supply-demand matching, and as the recruitable mitochondrial  $K_{ATP}$ -channel that can limit ischemia-reperfusion injury. Isolated mitochondria in the presence of  $K^+$  can sustain  $\sim 3.5$ -fold higher ATP-synthesis-flux (vs  $K^+$  absence) driven by a 2.7:1  $K^+:H^+$  stoichiometry with unaltered OxPhos coupling. Excellent agreement between  $F_1F_o$  single-molecule and intact-mitochondria experiments is consistent with  $K^+$ -transport through ATP synthase driving a major fraction of ATP synthesis.

## Keywords

ATP synthase regulation / ATPase Inhibitory Factor-1 ( $IF_1$ ) / Bcl-2 family proteins / mitochondrial potassium transport and volume regulation / mitochondrial permeability transition pore

## Introduction

The family of ATPases shares a number of proteins with conserved functions and molecular composition (Cross and Muller, 2004). F-, A- and V-ATPases are true biological rotary engines that work as coupled motors: the  $F_1/A_1/V_1$  is chemically driven (i.e., effecting transduction of mechanical and chemical energy) and the membrane-embedded  $F_o/A_o/V_o$  is powered by the energy stored in a transmembrane ion gradient (Kuhlbrandt and Davies, 2016; Stock et al., 1999). Of these, a specialized group, the ATP *synthases*, is the major route to ATP synthesis. One of the best characterized members of ATPases is the  $F_1F_o$ -ATP synthase ( $F_1F_o$ ) of *E. coli*, mitochondria and chloroplasts. It was demonstrated that both  $F_1$  and  $F_o$  subunits are required for ATP synthesis (Boyer, 1997).

ATP synthase operates as two rotary stepper generators coupled by a common shaft, the  $\gamma$  subunit (Abrahams et al., 1994; Boyer, 1997; Noji et al., 1997). The torque that is generated by ion flow through the  $F_o$  motor operates against the counter-torque in  $F_1$  driven by the energy of ATP hydrolysis. The *direction* of  $F_1F_o$  is determined by which torque is larger: that of the driving force of the ion electrochemical potential or that produced by the ATP chemical potential. Under physiological conditions,  $F_o$  torque exceeds the  $F_1$ -generated counter-torque at ambient ATP levels, and thus the system proceeds toward ATP synthesis. Although the principal function of the  $F_1F_o$  is to harness the energy stored in electrochemical ion gradients to make ATP, it can nevertheless run backwards (as an ATP hydrolase) pumping ions in the opposite direction in the absence of the activity of a regulated inhibitory protein. This scenario would occur if, (1) the ATP levels would rise substantially relative to the ion gradient magnitude, or (2) the ion gradient becomes dissipated, as occurs during ischemia.

During ischemia, consuming substantial amounts of ATP at a time when its supply is limited would likely be detrimental in energetically-sensitive cells such as cardiomyocytes and neurons. It is known that Inhibitory Factor-1 ( $IF_1$ ), a small  $\sim 12$ kDa regulatory protein, limits the reversal of  $F_1F_o$  function, and that during ischemia this helps to prevent excessive (or even futile) ATP consumption by damaged mitochondria to maintain  $\Delta\Psi_m$ . Opening of an ATP-inhibited mitochondrial  $K^+$  channel ( $mK_{ATP}$ ),

activated either by repetitive short periods of ischemia (“ischemic preconditioning”) or by  $K^+$  channel openers (KCO) such as diazoxide (Dz), serves as a critical link in a cascade of kinases preventing the deleterious effects of opening the mitochondrial permeability transition pore (mPTP), limiting cell damage and death after ischemia (Juhaszova et al., 2008; Juhaszova et al., 2004; Zorov et al., 2009). Interestingly, Dz binds to and enhances the inhibitory functions of  $IF_1$  (Contessi et al., 2004) suggesting a tendency to preserve ATP during ischemia that may lead to enhanced cell survival and resistance to damage.

Most ATPases harness the free energy of the transmembrane electrochemical proton gradient,  $\Delta\mu_H$ , but some use a  $Na^+$  gradient instead (e.g., see (Kaim and Dimroth, 1995)). While the mechanistic basis of ion-selectivity of various ATP synthases is a matter of considerable interest (Leone et al., 2015), it is even more intriguing to consider the possible significance for mitochondrial function of the accompanying “non-specific” ion flux via  $F_1F_0$ . The specificity of  $F_1F_0$  for  $H^+$  over other cationic species was found to be extremely high (estimated  $>10^7$ ) (Feniouk et al., 2004). It can be calculated using the Goldman-Hodgkin-Katz equation (Hille, 2001) that for  $H^+$  selectivity values of  $10^7$  and  $10^8$ ,  $F_1F_0$  would conduct a non-trivial  $\sim 24$  and  $2 K^+$ , respectively, for every  $100 H^+$  during normal ATP synthesis (at cytosolic  $pH=7.2$  and  $K^+=140$  mEq/L) due to the  $>10^6$ -fold excess of cytoplasmic  $K^+$  over  $H^+$ . Given the large electrical force driving  $K^+$  to the mitochondrial matrix, it would make sense to harness this energy to generate ATP rather than to dissipate  $\Delta\mu_K$  as heat. Because the activity of the respiratory chain is known to be regulated by intramitochondrial volume controlled by  $K^+$  influx (Garlid et al., 2003), the added benefit would be the direct coupling of respiratory chain activity and  $\Delta\Psi_m$  dissipation (caused by energy utilization/production) to an osmotic signal given by the amount of  $K^+$  traversing  $F_1F_0$  to make ATP, facilitating the proportional matching between energy supply and demand. Finally, that part of the proton gradient and energy not being directly dissipated via ATP synthase because of the equivalent movement of charge as  $K^+$  would then be available to drive  $K^+$  efflux from mitochondria using the  $K^+/H^+$  exchanger (KHE), thus restoring osmotic balance. These principles are fully compatible with Mitchell’s chemiosmotic mechanism (Mitchell, 1961; Nicholls and Ferguson, 2013).

We investigated the possible existence of a novel, regulated function set for ATP synthase based on the postulated ability to harness energy from  $K^+$  flux. This would enable  $K^+$  uniporter-like function and serve to facilitate energy supply-demand matching, while under certain circumstances, also to function as a  $mK_{ATP}$ . We found that while retaining the high degree of  $H^+$ -selectivity, the chemo-mechanical efficiency, and the monovalent cation conductance of  $F_1F_0$  can be increased by certain KCOs and by endogenous pro-survival proteins, Bcl-xL and Mcl-1. This process requires  $IF_1$  and is regulated naturally by the concentration of ATP. We also demonstrated its role in protection signaling in intact cardiomyocytes.

## Results

### Potassium channel openers activate $K^+$ flux into proteoliposome-reconstituted ATP synthase

First, to measure  $K^+$  flux into proteoliposome (PL)-reconstituted purified  $F_1F_0$  (see Figure S1), the  $K^+$ -sensitive fluorescent dye, PBFI, was trapped inside the vesicles under conditions shown in Figure 1A. In the presence of the protonophore FCCP (to enable charge balance necessary for  $K^+$  flux and to maintain membrane potential,  $\Delta\Psi_m=0$ ), the  $K^+$  channel opener (KCO) diazoxide (Dz) significantly enhanced the initial rate of  $K^+$  flux into PL; this effect was completely blocked both by the  $F_0$  inhibitor venturicin B (Vent), and the  $mK_{ATP}$  blocker, 5-hydroxydecanoate (5-HD), while it was essentially absent in  $IF_1$ -depleted  $F_1F_0$  (Figure 1B).

The reconstituted purified  $F_1F_0$  subjected to a transmembrane  $K^+$  gradient at  $\Delta pH=0$  generated a stable  $\Delta\Psi_m$ , reaching a maximal voltage of  $\sim 55$  mV (Figure 1C). The fact that this  $\Delta\Psi_m$  remains stable until

being dissipated by FCCP, in principle, rules out the possibility of contamination by an unidentified  $K^+/H^+$  antiport or another charge-exchange mechanism. To further elucidate this possibility, we utilized an

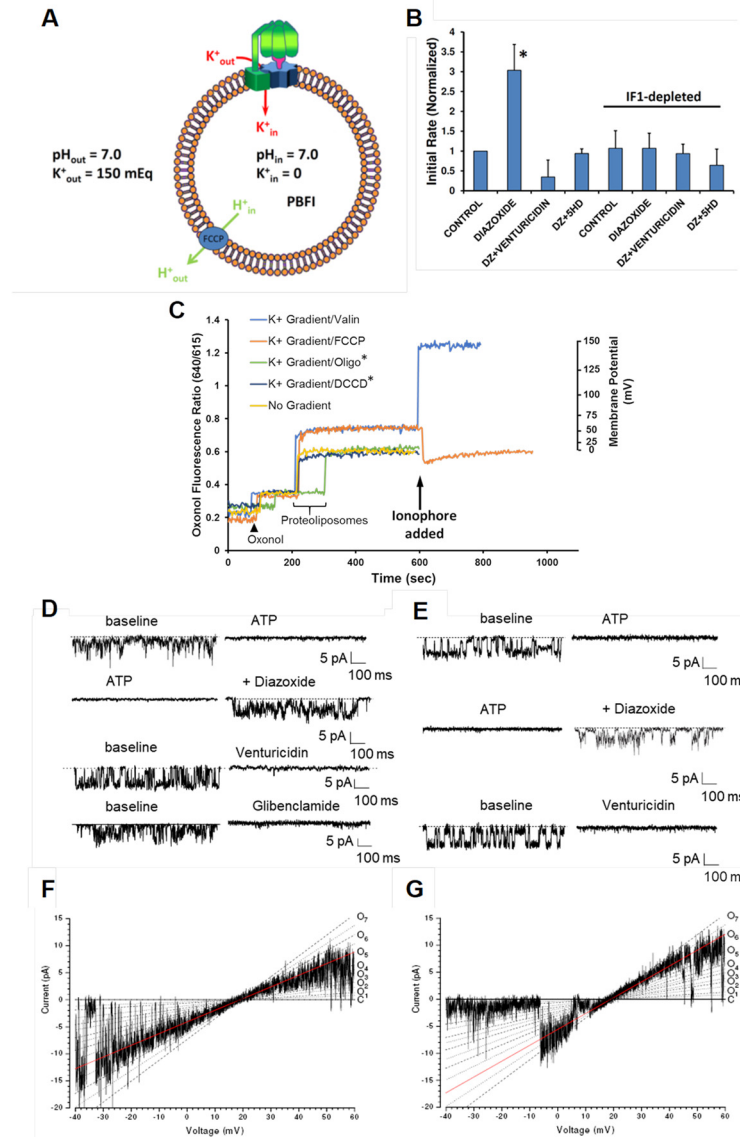

**Figure 1.** (A) Scheme of the PL system; ionic composition of the internal and external buffer, used in  $K^+$  transport experiments. (B) Kinetics of  $K^+$  flux into PL; effect of  $IF_1$  depletion. The KCO, Dz, significantly enhanced the rate of  $K^+$  flux into PL; this effect was blocked both by the  $F_0$  inhibitor, Vent, and the  $mK_{ATP}$  blocker, 5-HD, and was absent in  $IF_1$ -depleted  $F_1F_0$ . \*  $P < 0.05$ . (C) Ratiometric fluorescence measurements of  $\Delta\Psi$  generated in  $F_1F_0$ -reconstituted proteoliposomes by a  $K^+$  gradient performed with oxonol VI (excitation 560, emission 640/615 nm). PL-reconstituted  $F_1F_0$  develops a stable, non-zero  $K^+$  diffusion-potential ( $\Delta\Psi \sim 55$  mV; orange and light blue traces) in a  $K^+$  concentration gradient (200 mM  $K^+_{out}/0.5$  mM  $K^+_{in}$ ; other conditions as in panel A except PBF1 omitted) that was completely dissipated by 1  $\mu$ M FCCP (orange trace). Addition of 10 nM valinomycin (instead of FCCP) resulted in a maximal  $K^+$  permeability and increase of the oxonol VI fluorescence ratio representing a membrane potential of  $\sim 150$  mV (light blue trace).  $F_0$  inhibitors DCCD and Oligo (green and dark blue traces) prevented the development of  $\Delta\Psi$  by the  $K^+$  gradient; thus, ATP synthase (and not some other contaminating  $K^+$  conductance/channel) is responsible for  $\Delta\Psi$  under control conditions because it is  $K^+$ -permeable. PL without a  $K^+$ -gradient do not develop  $\Delta\Psi$  (yellow trace). The Nernst potential-calibrated values of  $\Psi$  were set by different  $K^+$  gradients using 10 nM valinomycin (right Y-axis). (D-G) Planar lipid bilayer experiments. (D) Unitary  $K^+$  currents from purified  $F_1F_0$  and (E) from conventional mitochondrial membrane preparation (at -40 mV), reconstituted into lipid bilayers; pre-intervention baseline recordings are on the left, and the effect of the various compounds are shown (2 mM MgATP, 30  $\mu$ M Dz, 4  $\mu$ M Vent, 50  $\mu$ M Glib). KCOs reverse ATP-inhibited permeation of  $F_1F_0$  by  $K^+$  that can be blocked by Vent and Glib. (F,G) Unitary  $K^+$  currents elicited in response to a voltage ramp (14.1 mV/sec) distinguish multiple conductance levels represented by  $O_1$ - $O_7$  (C-closed state). The 216 pS conductance ( $O_5$ ) is predominantly active in the recording shown in panel F, while the 293 pS conductance ( $O_6$ ) is active during the recording in panel (G) (highlighted by red lines).

electrophysiological approach to rule out the presence of any other cation-selective channel activity in our  $F_1F_0$  preparations (Figure S2A,B). It has been suggested that a mitochondrial ROMK potassium channel might act as the pore-forming subunit of a cytoprotective  $mK_{ATP}$  channel (Foster et al., 2012). Our immunoblotting with anti-ROMK antibody ruled out ROMK channel contamination of the isolated  $F_1F_0$  (Figure S2C).

### Measurement of unitary $K^+$ and $H^+$ currents from $F_1F_0$

In unitary ion channel recordings from lipid-bilayer reconstitution experiments with purified  $F_1F_0$ , Dz reversed ATP-inhibited ion flux that can be blocked by the  $F_0$  inhibitor, Vent, by the  $mK_{ATP}$  inhibitor, glibenclamide (Figure 1D) and by  $F_0$  inhibitors oligomycin and  $N,N'$ -dicyclohexylcarbodiimide (DCCD; see below). Considering that similar findings are obtained in conventional mitochondrial membrane reconstitution studies (i.e., without using a purified  $F_1F_0$ ), for the first time we show that the unitary ion currents derived from conventional  $mK_{ATP}$  preparations, which display the same characteristics as the purified  $F_1F_0$  complex, can be largely inhibited by Vent (Figure 1E) at levels that do not affect sarcolemmal  $mK_{ATP}$  currents. Unitary currents from purified  $F_1F_0$  exhibit multiple conductance levels (Figure 1F,G) in agreement with single channel behavior of conventional  $mK_{ATP}$  preparations. This complex behavior may arise from the multiple ion-binding positions on the  $F_0$  c-ring. A comprehensive literature search regarding the single channel characteristics of conventional  $mK_{ATP}$  channel preparations reconstituted into lipid bilayers indicates that multiple levels are frequently observed (five distinct peaks/conducting states between 20 pS and 120 pS in symmetric 150 mM K glutamate (Jiang et al., 2006; Nakae et al., 2003) and conductances between 100-275 pS in symmetric 100 mM KCl (Grigoriev et al., 1999; Mironova et al., 1999) which is largely consistent with the present data.

The ion-specificity of the observed unitary currents requires closer examination because mammalian  $F_1F_0$  is thought to make ATP only by  $H^+$  flux. In the present experiments, the abundance of  $K^+$  over  $H^+$  was  $\sim 10^6:1$  (comparable to that occurring in cells), so it is reasonable to consider that  $K^+$  permeation may be contributing as well. Furthermore, the potential contribution of anion permeation cannot be excluded *a priori*. Because only permeant ions contribute to the net ion-current reversal potential ( $E_{rev}$ ), this was examined in detail under various conditions to assess the possibility of anion permeation and to interpret the changes in cation permeation activated by KCOs. Since complete substitution of the substantially larger and rather non-permeant Hepes anion for  $Cl^-$  causes no change in  $E_{rev}$  ( $17.9 \pm 0.7$  vs  $18.6 \pm 0.5$  mV, respectively,  $P=ns$ ), we concluded that the impact of  $Cl^-$  permeation via  $F_1F_0$  is insignificant compared to cations. Additionally, the current-voltage relationship of purified  $F_1F_0$  was examined in a pH gradient ( $pH_{cis}=8.0$ ,  $pH_{trans}=7.2$ , buffered by  $TEA^+$ -Hepes, in the absence of  $K^+$  or any other small cation aside from  $H^+$ ) yielding a reversal potential identical to the expected Nernst potential for  $H^+$  as the only permeant species, in agreement with the idea that the  $OH^-$  anion is non-permeant. Since the measured unitary ion currents under control conditions consist only of  $H^+$  and  $K^+$ , we next assessed their relative contributions. Under ionic conditions where the reversal potential for  $H^+$  ( $E_H$ ) was 0 mV and that for  $K^+$  ( $E_K$ ) was +28 mV,  $E_{rev}$  was found to be  $\sim +18$  mV indicating that both cations must be permeant and contributing to the total currents observed. In this case,  $E_{rev}$  is given by:

$$E_{rev} = \frac{RT}{F} \ln \left( \frac{P_K [K]_o + P_H [H]_o}{P_K [K]_i + P_H [H]_i} \right) = \frac{RT}{F} \ln \left( \frac{[K]_o + \frac{P_H}{P_K} [H]_o}{[K]_i + \frac{P_H}{P_K} [H]_i} \right)$$

where :

R is the molar gas constant

F is Faraday's constant

T is temperature (°K)

$P_K$  and  $P_H$  are the respective ion permeabilities

$[K]_{o,i}$  and  $[H]_{o,i}$  are ion concentrations across the bilayer

(1)

Maintaining steady voltages at each of the ion-reversal potentials (to remove the driving force from the specific cation, thus rendering pure unitary current from the other cation) produced macroscopic  $H^+$  and  $K^+$  currents (at +28 and 0 mV, respectively) of the same characteristics and open probability ( $P_o$ ) as at -20 or -40 mV (Figure 1F,G). Importantly, the KCO Dz increases  $P_o$  and amplitude for both  $H^+$  and  $K^+$  currents (Figure 1D,E) without causing any change in  $E_{rev}$  ( $18.3 \pm 1.3$  vs  $18.5 \pm 0.9$  mV with Dz,  $P=ns$ ; similar data was obtained with  $Na^+$ :  $18.1 \pm 1.0$  vs  $18.9 \pm 1.0$  mV;  $n=10$ ). This indicates that while the permeability for  $H^+$  and  $K^+$  after Dz increases for both cations, the ratio ( $P_H/P_K$ ) remains unchanged (see eq.1). From the Goldman-Hodgkin-Katz (GHK) formalism, the total ion current is related to the individual ion permeability as follows:

$$I = P_H Z_H^2 \frac{VF^2}{RT} \left( \frac{[H]_i - [H]_o \exp\left(\frac{-Z_H VF}{RT}\right)}{1 - \exp\left(\frac{-Z_H VF}{RT}\right)} \right) + P_K Z_K^2 \frac{VF^2}{RT} \left( \frac{[K]_i - [K]_o \exp\left(\frac{-Z_K VF}{RT}\right)}{1 - \exp\left(\frac{-Z_K VF}{RT}\right)} \right) \quad (2)$$

where :

Z is the appropriate ion valence

V is the transmembrane voltage

We determined that the baseline values for  $P_H$  and  $P_K$  ( $5.2 \pm 0.9 \times 10^{-11}$  and  $8.7 \pm 2.9 \times 10^{-17}$   $m^3/s$ , respectively) each increases ~3.5-fold after Dz (to  $2.2 \pm 1.3 \times 10^{-10}$  and  $3.0 \pm 1.4 \times 10^{-16}$   $m^3/s$ , respectively,  $n=4$ , both  $P < 0.05$  vs. each ion's baseline value), thus keeping the selectivity of  $F_1F_o$  for  $H^+$  over  $K^+$  at  $\sim 10^6:1$ . Regarding the single ion channel behavior of the conventionally-prepared  $mK_{ATP}$ , close inspection of the electrophysiological data referred in eight published papers allowed us to extract baseline values for  $P_H$  and  $P_K$  (mean values of  $4.9 \pm 1.1 \times 10^{-11}$  and  $1.9 \pm 0.5 \times 10^{-16}$   $m^3/s$ , respectively) (Bednarczyk et al., 2005; Dahlem et al., 2004; Grigoriev et al., 1999; Jiang et al., 2006; Mironova et al., 1981; Mironova et al., 2004; Nakae et al., 2003; Zhang et al., 2001) which compare extremely well with those obtained here for  $F_1F_o$ .



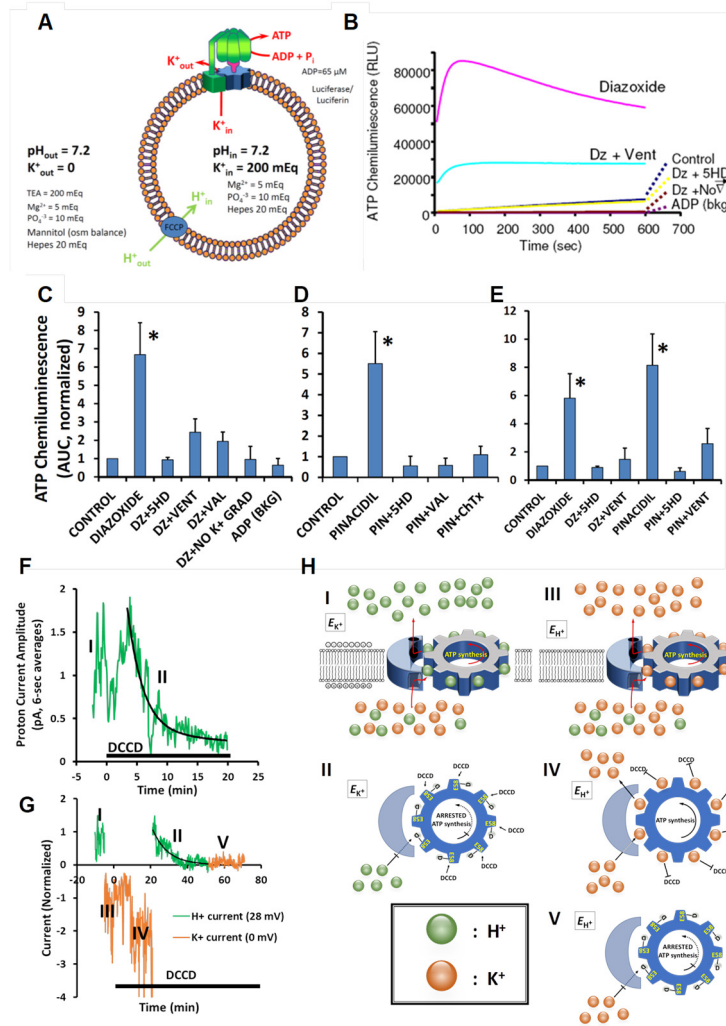

**Figure 2.** (A) Scheme of the PL and reaction conditions to measure  $K^+$  transport-coupled ATP synthesis (and hydrolysis).  $\Delta\mu_H=0$  for ATP synthesis and  $\Delta\Psi=0$  by using FCCP; n.b., omitting FCCP eliminates ATP synthesis ruling out the presence of an unsuspected, underlying  $K^+/H^+$  antiport mechanism. (B,C)  $K^+$ -gradient-driven ATP production in PL is activated by Dz and (D) pinacidil, and (B-D) attenuated by inhibitors of  $F_1F_0$ , inhibitors of the  $mK_{ATP}$  and  $BK_{Ca}$  channels, and by  $K^+$  gradient dissipation (Val or No  $K^+$  grad). (E)  $Na^+$ -gradient-driven ATP production in PL is activated by Dz and pinacidil and attenuated by inhibitors of complex V and the  $mK_{ATP}$ . These experiments prove that the entity activated by KCOs is the  $F_1F_0$ . \*  $P<0.05$ . (F-H) Effect of DCCD on lipid bilayer-reconstituted  $F_1F_0$  activity during conduction of pure  $H^+$  (at +28 mV, green traces) and  $K^+$  (at 0 mV, orange traces) currents (cis: 150 mEq  $K^+$ , pH 7.2/ trans: 50 mEq  $K^+$ , pH 7.2; 1 kHz-recorded data for multiple-minute experiments are plotted as 6-sec averages). (F) Continuous recording of unitary  $H^+$  current (phase ‘I’; green trace);  $H^+$  current is completely blocked by DCCD with  $t_{1/2}\sim 6$  min (phase ‘II’; exposure to DCCD is indicated by the black horizontal bar). (G) Baseline performance of  $F_1F_0$  initially driven by  $H^+$  current (phase I; green), then switched to  $K^+$  current (phase ‘III’, orange), followed by addition of DCCD (black bar, initiated at “0” time) which fails to block  $K^+$  current-driven activity after 20 min (phase ‘IV’, orange), then switched back to  $H^+$  current (at 20 min DCCD exposure, phase ‘II’, green) leading to rapid inhibition of activity, then back to  $K^+$  current (at 50 min DCCD, phase ‘V’, orange) displaying persistence of inhibition. (H, Panels I-V) Mechanistic schema of ‘phases’ of  $F_1F_0$  driven by  $K^+$  (orange) or  $H^+$  (green) currents corresponding to those depicted in panels F,G. (Hi)  $H^+$ -driven rotation at the reversal potential for  $K^+$  ( $E_{K^+}$ ); (Hii) inhibition of  $H^+$ -driven rotation after DCCD reaction with protonated E58; (Hiii)  $K^+$ -driven rotation at the reversal potential for  $H^+$  ( $E_{H^+}$ ); (Hiv) inability of DCCD to inhibit  $K^+$ -driven rotation due to occupancy of E58 by  $K^+$  (rather than by a  $H^+$  required for DCCD reaction and formation of the acylurea adduct); (Hv) once the enzyme is deactivated by DCCD during prior  $H^+$  current passage (and formation of a stable acylurea adduct on E58), subsequent  $K^+$  flux is also blocked. Together, these results serve as another line of proof that mammalian  $F_1F_0$  can operate utilizing  $K^+$  flux, and that both  $K^+$  and  $H^+$  travel the same route within the complex on the  $c$ -ring.

The importance of  $F_1F_0$  as a major  $K^+$  pathway can be realized from Eq. 2 which shows the sum of the  $K^+$  and  $H^+$  current components in the GHK formulation. For sufficiently large  $\Delta\Psi_m$  magnitudes ( $>100$  mV

for the present case), a rearrangement of Eq. 2 expressing the ratio of  $K^+$  to  $H^+$  conducted by  $F_1F_o$  simplifies to the limiting value,  $[(P_K[K^+]_{cytosol})/(P_H[H^+]_{cytosol})]$  at *negative*  $\Delta\Psi_m$  (the direction of ATP synthesis). This means that  $F_1F_o$  may potentially conduct an average of 3.7  $K^+$  for every  $H^+$  during *normal* ATP synthesis (at cytosolic pH=7.2 and  $K^+$ =140 mEq/L; (see section: **Quantitative comparison of  $H^+$  and  $K^+$  current magnitudes through ATP synthase in Supplemental information**).

### ATP synthesis by proteoliposome-reconstituted $F_1F_o$ in a $K^+$ gradient

To investigate whether ATP synthase can harness energy from  $K^+$ -flux, purified  $F_1F_o$  reconstituted into PL was subjected to a transmembrane  $K^+$  gradient (Figure 2A). Under conditions in which  $\Delta\Psi=0$ , and  $\Delta\mu_H$  and  $H^+$  were unable to drive ATP synthesis due to the presence of protonophore, FCCP, we show that ATP synthesis driven by the  $K^+$  gradient occurs under these conditions, and was increased several-fold by the KCOs, Dz or pinacidil. This ATP synthesis was inhibited by the specific  $F_o$  inhibitor, Vent, the  $mK_{ATP}$  blocker, 5-HD, and abolished by the  $K^+$  ionophore, valinomycin (Val) Figure 2B-D). Interestingly, the  $F_1F_o$  is not selective among alkali ions after KCO-activation, since we observed a comparable degree of ATP synthesis in a  $Na^+$  gradient, akin to that in a similar  $K^+$  gradient (Figure 2E). Moreover, this effect seems to be restricted to small cations, since there is no ATP generated by KCO activation of the  $F_1F_o$  in a comparable gradient of  $TEA^+Cl^-$ . Similar  $K^+$  gradients with either  $Cl^-$  or  $SO_4^{2-}$  as counterions yielded comparable ATP amounts (not shown). It is important to note that FCCP is necessary to enable ATP synthesis driven by the  $K^+$  gradient because it equilibrates the transmembrane charge (via passive inward diffusion of  $H^+$ ) owing to  $\Delta\mu_K$ -driven  $K^+$  efflux via  $F_1F_o$ . Omitting FCCP eliminates ATP synthesis ruling out the possible contamination of the PL's by an unsuspected protein which might cause an underlying  $K^+/H^+$  antiport activity (see Figure S2 for additional details). Thus, any possibility that the observed ATP synthesis was due to  $F_1F_o$  surreptitiously harnessing  $H^+$  flux energy (somehow derived from the original  $K^+$  gradient energy) is ruled out by this FCCP result, because ATP synthesis would instead have been prevented by the protonophore-elicited dissipation of  $H^+$  energy. This evidence also shows that  $K^+$  can drive ATP synthesis by the same mechanism and path as  $H^+$ .

To further investigate whether the  $K^+$  and  $H^+$  paths through  $F_1F_o$  are the same, we utilized the inhibitor DCCD that acts by specifically and covalently modifying the *protonated* form of a conserved glutamate carboxylate (E58) located in the binding pocket of the membrane-embedded c-ring (Kluge and Dimroth, 1993; Pogoryelov et al., 2010; Symersky et al., 2012) and performed measurement of unitary ion channel currents from  $F_1F_o$  under conditions where we could generate and select pure  $K^+$  and  $H^+$  currents by setting specific membrane potentials. Since E58 is critical for coordinating ion binding necessary for the  $H^+$  gradient to generate ATP, we found that DCCD rapidly inhibits ion flux ( $t_{1/2} \sim 6$  min) when being driven by pure  $H^+$  current (Figures 2F, H<sub>I,II</sub>), as expected. So long as the c-ring binding pockets are  $H^+$ -bound, continuing active  $H^+$  flux is not required for DCCD's block since we found that the inhibition fully develops when the c-ring is "stalled" without ion flow after running pure  $H^+$  current (Figure S3).

We hypothesized that E58 in the *deprotonated* state is also critical for  $K^+$  binding related to its generation of ATP, and that occupancy of the same binding site by  $K^+$  (likely by preventing glutamate protonation via charge neutralization and physical exclusion) would specifically prevent  $F_1F_o$  from reacting with, and being inactivated by, DCCD (Figures 2G, H<sub>III,IV</sub>). We employed  $K^+$ -only current conditions (i.e., under the present experimental conditions at 0 mV where there is no  $H^+$  driving force, and hence, no  $H^+$  current) for 5 min *before* exposure to DCCD (Figure 2G orange trace labelled 'III', and Figure 2H<sub>III</sub>). We found that the maintenance of  $K^+$ -flux and binding *prevented* the subsequent DCCD block for at least 15 min (Figure 2G, orange trace labelled 'IV', and Figure 2H<sub>IV</sub>), and for as long as 1 hour under continuous  $K^+$  currents (Figure S3), indicating protection of E58 by  $K^+$  from the inhibitory reaction with DCCD. Similar protection by  $Na^+$  from inhibition by DCCD was described for this



conserved, essential Glu site of the *c*-subunit from *P. modestum* (Kluge and Dimroth, 1993). Returning to driving  $F_1F_0$  with  $H^+$  currents after the “protective”  $K^+$  current protocol, in the continuing presence of

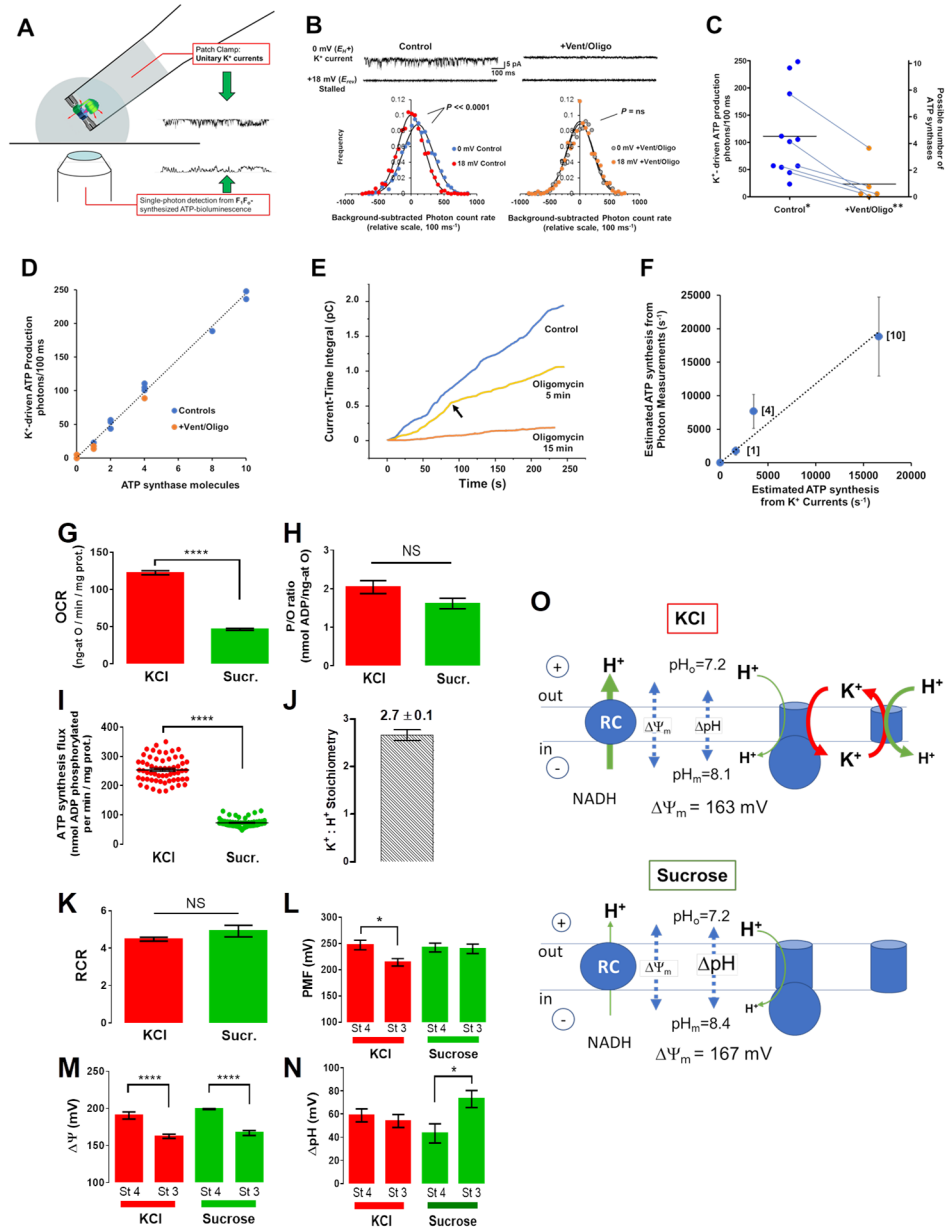

**Figure 3.** (A-F) Direct, “single molecule bioenergetics” demonstration of  $K^+$ -driven ATP synthesis by  $F_1F_0$  using simultaneous measurements of  $K^+$  currents and single-photon detection of ATP. (A) Experimental scheme for simultaneous measurements of unitary  $K^+$  currents (by voltage clamp) and low light level detection of ATP synthesis activity (luciferase/luciferin bioluminescence) from reconstituted single molecules of  $F_1F_0$  in a lipid bilayer formed on a 30-50  $\mu\text{m}$  glass pipette (*cis*: 150 mEq  $K^+$ , pH 7.2/ *trans*: 50 mEq  $K^+$ , pH 7.2). (B) Representative experiment performed as described in (A). Top traces:  $K^+$  current in control (left) and that after  $F_1F_0$  inhibition by Vent+Oligo (right), together with corresponding measurements with  $F_1F_0$  activity stalled at  $E_{rev}$ . Bottom panels: Frequency histograms of detected bioluminescence photons from ATP generated by  $K^+$ -driven  $F_1F_0$  (background-subtracted photon counts measured during  $K^+$  current (0mV) and at the  $E_{rev}$  (18mV); Control experiment (left) vs Vent+Oligo block (right)). Note that the Control photon-rate frequency histogram during active  $K^+$  currents (at 0 mV,  $E_{H^+}$ ) shows the production of  $\sim 50$  photons/100 ms above that when stalled (no currents at +18 mV,  $E_{rev}$ ;  $n=1000$  observations each histogram,  $P < 0.0001$  for paired comparison), and that both the 0 mV current and associated photon production are abolished with +Vent/Oligo ( $E_{H^+}$  vs  $E_{rev}$ ;  $n=1000$  observations each histogram,  $P=ns$ ). (C) Concatenated experimental results:  $K^+$ -driven photon production in control (0 mV vs stalled at +18mV,  $n=11$  paired observations,  $*P < 0.0001$  by Fisher’s combined probability test) and (legend continued on next page)

DCCD, lead to rapid and irreversible inhibition of the enzyme (Figure 2G green trace labelled ‘II’, Figure 2H<sub>II</sub>, and Figure S3). Once the enzyme was deactivated by DCCD during H<sup>+</sup> current passage, we found that K<sup>+</sup> flux is also blocked (Figure 2G orange trace labelled “V” and Figure 2H<sub>V</sub>; Figure S3), consistent with the DCCD reaction forming a stable acylurea adduct on E58. Together, these results serve as another line of proof that mammalian F<sub>1</sub>F<sub>o</sub> can operate utilizing K<sup>+</sup> flux, and that both K<sup>+</sup> and H<sup>+</sup> travel the same route within the complex on the *c*-ring.

### Direct demonstration of K<sup>+</sup>-driven ATP synthesis by simultaneous measurements of K<sup>+</sup> currents and single-photon detection of ATP: “Single Molecule Bioenergetics”

To directly demonstrate that ATP synthesis can be driven specifically by K<sup>+</sup> flux through F<sub>1</sub>F<sub>o</sub> and the energy stored in an electrochemical K<sup>+</sup> gradient, we designed a unique system for simultaneous measurement of unitary K<sup>+</sup> ion currents (by voltage clamp) together with ATP synthesis (from low light-level detection of bioluminescence) generated by single molecules of ATP synthase (Figure 3A-F). Single molecules of purified F<sub>1</sub>F<sub>o</sub> were reconstituted in the lipid bilayer formed on a 30-60 μm glass pipette tip (Figure 3A). Pure K<sup>+</sup> current-driven ATP synthase activity due to Δμ<sub>K</sub> produced by the experimental K<sup>+</sup> gradient (at 0 mV, when Δμ<sub>H</sub>=0) was accompanied by a significant increase in the photon rate (i.e., real ATP generation) over background (at 18 mV with F<sub>1</sub>F<sub>o</sub> stalled and no K<sup>+</sup> or H<sup>+</sup> currents) that in turn was significantly inhibited by specific F<sub>o</sub> blockers, Vent/Oligo (representative experiment in Figure 3B; concatenated results in Figure 3C). *This experiment provides unambiguous and definitive proof of K<sup>+</sup>-driven ATP production by single molecules of mammalian ATP synthase under conditions reasonably matching the physiological K<sup>+</sup> ionic milieu.* In this experiment, K<sup>+</sup>, the only monovalent cation capable of performing electrochemical work, is thermodynamically driven by its preset gradient in the direction of ATP synthesis, whereas protons are incapable of performing work because the experiment is performed under circumstances constraining Δμ<sub>H</sub>=0. That the entity that synthesizes ATP as a result of the work performed by K<sup>+</sup> flux is significantly blocked by the specific F<sub>o</sub> inhibitors, Vent and Oligo, provides

---

that after F<sub>1</sub>F<sub>o</sub> inhibition by Vent+Oligo (paired observations with control, n=5, \*\*P<<0.0001 by Fisher’s combined probability test); measured photon production rates from K<sup>+</sup>-driven ATP synthesis appeared to be quantized in relation to the number of incorporated F<sub>1</sub>F<sub>o</sub> (“Possible number of ATP synthases” on right y-axis; see text for further details). (D) Analysis of apparent quantal nature of K<sup>+</sup>-driven photon (ATP) production rate vs the proposed number of bilayer-incorporated ATP synthase molecules (from experimental results, panel (C); regression analysis slope of ~25 photons/100 ms/ATP synthase, R<sup>2</sup>=0.99. (E) Evidence for F<sub>1</sub>F<sub>o</sub> lipid bilayer insertions as functional dimers. Time course of the cumulative K<sup>+</sup> current-time integral recording (running ATP synthesis index) from a representative F<sub>1</sub>F<sub>o</sub> experiment in control (blue trace) and during Oligo inhibition (yellow and orange traces); arrow (yellow trace, 5 min Oligo) indicates abrupt change of the current-time integral slope (to half of the control value) consistent with the initial activity of an F<sub>1</sub>F<sub>o</sub> dimer being reduced by one functional unit to the equivalent of a monomer; after 15 min Oligo (orange trace), the activity of the remaining F<sub>1</sub>F<sub>o</sub> (monomer) becomes fully inhibited (n.b., slight deviation from a zero-slope is a typical baseline artifact of cumulative electrical drifts in 4+ minute electrical recordings, and because it occurs in lipid bilayer recordings without protein incorporation, does not represent residual ATP synthase activity). (F) Relationship between ATP synthesis rates calculated from single photon vs K<sup>+</sup> current measurements (see text for details). The number of F<sub>1</sub>F<sub>o</sub> molecules is shown in brackets for several independent experiments; the average ATP synthesis rate is ~1000 ATP/sec/F<sub>1</sub>F<sub>o</sub> driven solely by K<sup>+</sup> current in the nominal absence of ATP (thus without significant counter-torque on F<sub>1</sub>, in contrast to physiological conditions). ATP synthesis rates estimated independently from single photon vs K<sup>+</sup> current measurements are in excellent agreement, deviating from unity by <18%, R<sup>2</sup>=0.98. (G) Seahorse-instrument oxygen consumption rate (OCR) of isolated rat heart mitochondria under state 3 was determined in KCl- or sucrose-based assay medium in the presence of 5/5mM G/M and 0.5mM ADP. The oligomycin-sensitive OCR was obtained by subtracting from state 3 OCR the state 4 OCR measured in the presence of 10μM oligomycin; n=60/3 experiments, P<0.0001. (H) P/O ratio was measured using high resolution respirometry as described in Methods under similar conditions as those described in panel G; n=9/3 experiments, P=ns. (I) The ATP synthesis flux was calculated as the product of the oligomycin-sensitive OCR times the P/O ratio in K<sup>+</sup>- or sucrose-based assay medium; n=60/3 experiments, P<0.0001. (J) The K<sup>+</sup>/H<sup>+</sup> stoichiometry was calculated from the difference between the ATP synthesis flux in the presence of KCl vs in the presence of sucrose, in ratio to the ATP flux in sucrose; n=46/3 experiments. (K) Respiratory control ratio (RCR) was obtained from the OCR ratio state 3/state 4; n=60/3 experiments, P=ns. (L) The proton motive force (PMF) was determined according to: PMF = ΔΨ<sub>m</sub> - Z·ΔpH using ΔΨ<sub>m</sub> (panel (M); n=8/3 experiments; P<0.0001) and Z·ΔpH (panel (N); n=8/3 experiments; P<0.05) obtained under the indicated conditions with Z=2.303·RT/F (see also Supplemental Experimental Procedures). (O) Summary scheme describing the ion fluxes and their respective driving forces, ΔΨ<sub>m</sub> and ΔpH, determined under state 3 respiration in K<sup>+</sup>- or sucrose-based medium (see also Supplemental Experimental Procedures). \*P<0.05; \*\*\*\*P<0.0001

corroborating proof that ATP synthase is responsible for the observed synthesis of ATP, and not some unknown (or undescribed) complex.

The range of measured photon production rates from these experiments varied by an order of magnitude (~25 to 250 photons/100 ms) and appeared to be quantized (allowing for “noise”) with a “greatest common factor” of ~25 photons/100 ms which is probably consistent with the activity of 1 monomer of ATP synthase (Figures 3C right  $y$ -axis, D). We expected that there could be occurrences of multiple ATP synthases since these latter experiments were prepared with an increased amount of purified  $F_1F_0$  intended to increase both the potential for multiple insertions of ATP synthase into the lipid bilayer and the detected bioluminescence signal over noise. Plotting the  $K^+$ -driven photon production rate vs the proposed number of ATP synthase molecules (from 1 to 10 ATP synthases), and performing regression analysis of all experimental results, rendered a slope of ~25 photons/100 ms/ATP synthase (Figure 3D). The data pattern suggests that most of the insertions observed are of ATP synthase *dimers* and multiples thereof, whereas isolated monomers appeared to be relatively rare (accounting for <10% of observed occurrences). There are several additional lines of evidence for the idea of ATP synthase dimer-insertions: (1) examining the time course of inhibition of  $K^+$  current flux by oligomycin to find a quantal pattern of inhibition. In experiments producing ~50 photons/100 ms at baseline (indicated as dimers in Figure 3C) the current-time integral (CTI, the precise “electrical analog” of cumulative ATP synthesis) shows in a representative example that at ~5 min of oligomycin exposure the time-dependent slope of CTI (proportional to ATP synthesis *rate*) is abruptly reduced by exactly half, consistent with the activity of a dimer being reduced by one functional unit to the equivalent of a monomer (Figure 3E, yellow trace, arrow), and subsequently, after 15 min, the activity of the remaining ATP synthase becomes fully inhibited (Figure 3E, orange trace). (2) Purified ATP synthase is isolated mainly as dimers in the current protocol, as gauged by the abundance of ATPase activity in Clear Native PAGE in-gel assay (Figure S1). (3) ATP synthases form rows of natural dimers along cristae in mitochondria (e.g., as shown in five different species: bovine, *Y. lipolytica*, *P. anserina*, *S. cerevisiae*, and potato (Davies et al., 2011) and are isolated as natural dimers by other workers (e.g., as shown using transmission electron microscopy (Cough-Cardel et al., 2010).

We sought to further quantify and compare the ATP synthesis rates independently derived from single molecule electrical and bioluminescence measurements. Bioluminescence-emitted photon measurements, concatenated with the efficiencies of the ATP-luciferase reaction, light path and camera detection characteristics, together with the fraction of the solid angle collected from an isotropically-emitting point source by the objective lens, produce a quantitative estimate of ATP production rate (see Supplementary Methods). Additionally, an independent estimate of ATP synthesis rate from these same experiments can be derived from the parallel unitary current measurements since 3 ATP's are made from the flux of 8 ions through mammalian ATP synthase. Excellent agreement was obtained for single molecule ATP synthesis rates calculated from photon vs  $K^+$  current measurements incorporating the range of 1, 4 and 10 ATP synthases (<13% deviation from the line of identity; Figure 3F,  $r^2=0.93$ ), yielding the consistent value of ~1,900 ATP/s/ATP synthase driven by  $K^+$  ( $\pm 50$ , SEM of  $n=11$ ), which is in good agreement with published data (e.g., (Watt et al., 2010)). Note that ATP synthase is operating in these experiments against a negligible counter-torque because the ambient [ATP] is negligible, which is experimentally necessary to resolve the extremely low levels of bioluminescence generated from the driven activity of single molecules of ATP synthase. In the presence of “physiological” levels of ATP (~3-4 mM) the resultant chemical counter-torque exerted at  $F_1$  against the electrical torque driving  $F_0$  would reduce ion flux (conductance) and correspondingly ATP synthesis by about an order of magnitude (see section on “Regulation of mechano-chemical efficiency of  $F_1F_0$ ” below, and Figure 5H), so the equivalent ATP synthesis rate in these  $K^+$ -driven experiments would be ~190 ATP/s/ATP synthase ( $\pm 5$ , SEM of  $n=11$ ) in an intracellular

milieu, which is in good agreement with published data (Diez et al., 2004; Etzold et al., 1997; Junesch and Graber, 1991; Soga et al., 2012).

### **K<sup>+</sup>-driven ATP synthesis in isolated heart mitochondria**

Measurements of K<sup>+</sup> flux, a stable K<sup>+</sup>-diffusion potential, and purely K<sup>+</sup>-driven ATP synthesis in proteoliposome- and single molecule-reconstituted ATP synthase (Figures 1, 2, 3A-F), together with unitary K<sup>+</sup> and H<sup>+</sup> currents sustained by purified F<sub>1</sub>F<sub>0</sub> reconstituted in lipid-bilayers (Figure 1D, F, G), show that ATP synthesis can happen under physiological conditions (cytosolic pH=7.2 and K<sup>+</sup>=140 mEq) in which F<sub>1</sub>F<sub>0</sub> is driven by up to ~ 3.5 K<sup>+</sup> for every H<sup>+</sup>. These findings predict that, in mitochondria, K<sup>+</sup> transport carried by F<sub>1</sub>F<sub>0</sub> would share a sizable portion of the ATP synthesis flux driven by Δμ<sub>H</sub> with a high K<sup>+</sup>:H<sup>+</sup> stoichiometry.

To assess these predictions, we studied the effect of physiological levels of K<sup>+</sup> on the ATP synthesis flux and the corresponding K<sup>+</sup>:H<sup>+</sup> stoichiometry in isolated mitochondria at constant osmolality (260 mOsm) in the presence vs absence of K<sup>+</sup> (isosmotically substituting sucrose for K<sup>+</sup>). We quantified the Oligo-sensitive oxygen consumption rate (OCR) with high-throughput Seahorse respirometry (Figure 3G), and ADP/O ratio with high resolution respirometry (Oroboros) (Figure 3H). At similar respiratory control ratio (RCR~5) (Figure 3K), ATP synthesis was 3.5-fold higher in the presence of K<sup>+</sup> than in its absence (Figure 3I) with a K<sup>+</sup>:H<sup>+</sup> stoichiometry of 2.7:1 (Figure 3J). More robust ATP synthesis with K<sup>+</sup> resulted from a 2.65-fold higher respiratory flux (Figure 3G) at ADP/O ratio 2.0 and 1.6 (Figure 3H) in the presence and absence of K<sup>+</sup>, respectively. Under similar conditions, a significant mitochondrial K<sup>+</sup> influx happens during state 4-to-3 transitions (Figure S4B). The OCR values were within the range of reported data under similar conditions (Table S1).

Next, we employed radioactive tracers to measure the protonmotive force (PMF), and its individual components, ΔΨ<sub>m</sub> and ΔpH, in isolated rat heart mitochondria in the presence or absence of K<sup>+</sup> at constant (260mOsm) osmolality under states 4 and 3 respiration (Figures 3L-N). While ΔΨ<sub>m</sub> was similar under both respiratory states and in absence or presence of K<sup>+</sup> (Figure 3M), ΔpH was significantly higher under state 3 compared to state 4 respiration in the absence of K<sup>+</sup> whereas it remained constant in its presence (Figure 3N). This resulted in 0.3 pH units increase in the matrix when K<sup>+</sup> was absent (pH<sub>i</sub> 8.4 vs. 8.1) (Figure 3O) with pH 7.2 in the medium. Unlike in K<sup>+</sup> absence, where both ATP synthase and the respiratory chain (RC) are operating at slower rates with flux through the RC higher than through ATP synthase resulting in matrix alkalization driven by similar ΔΨ<sub>m</sub>, in K<sup>+</sup> presence, the matrix pH elevation does not happen due to the additional flux of K<sup>+</sup> through F<sub>1</sub>F<sub>0</sub> accompanied by enhanced ATP synthesis and H<sup>+</sup> entering mitochondria through the K<sup>+</sup>/H<sup>+</sup> exchanger (Fig. 3). Importantly, PMF, as an energy-proportional index, exhibited a significant decrease under state 3 respiration in the presence of K<sup>+</sup>, consistent with the additional output of ATP, whereas it remained constant in its absence (Figure 3L).

Using dynamic, simultaneous, fluorometric monitoring of ΔΨ<sub>m</sub>, NAD(P)H and volume (90° light scattering) rather than steady state measurements, we investigated possible effects of matrix alkalization on carbon substrate oxidation during state 4→3 transition in mitochondrial suspensions subjected to the addition of ADP pulses of increasing concentration (Fig. S4H-M). Under both conditions of K<sup>+</sup> presence and absence, the RC flux is controlled downstream of NADH, e.g., by the RC activities, ATP synthase, etc., (i.e., the “pull” condition) (Cortassa et al., 2003; Wei et al., 2011) as can be judged by the *in-phase* response of mitochondrial ΔΨ<sub>m</sub>, NAD(P)H and volume, in response to the increase in energy demand exerted by the ADP pulses, ruling out a matrix alkaline-pH limitation on substrate oxidation in either condition (Fig. S4H-D).



Mitochondrial volume changes associated with the state 3→4 transition, as measured with radioactive tracers, were greater in the K<sup>+</sup>-containing medium (1.25±0.15 to 0.81±0.16) than in sucrose (1.27±0.19 to 1.06±0.13 μl/mg prot) reflecting a more dynamic and higher rate of ADP influx and conversion to ATP, thus higher amplitude of volume changes in salt medium associated with the transition to fully energized state (see also Figure S4L-O). These results were corroborated by our fluorometric simultaneous measurements of ΔΨ<sub>m</sub> and volume of isolated heart mitochondria, where we show that, in the presence of K<sup>+</sup>, mitochondria exhibit significantly faster ATP synthesis as revealed by the shorter time lapse utilized to fully consume the ADP added (roughly 1000 sec vs. 1600 sec: compare H and I in Figure S4; see also panels N,O).

Together, our data indicate that mitochondria synthesize 3.5-fold higher rates of ATP synthesis in the presence of K<sup>+</sup> compared to osmotically-matched conditions in which this cation is absent. The 2.6-fold higher respiratory flux is mainly responsible for the higher ATP synthesis flux driven by a 2.7:1 K<sup>+</sup>:H<sup>+</sup> stoichiometry. Thus, in the presence of K<sup>+</sup>, both Δμ<sub>K</sub> and Δμ<sub>H</sub> energies (Δμ<sub>H</sub> producing Δμ<sub>K</sub> almost entirely through the driving force of ΔΨ<sub>m</sub>) are utilized to synthesize ATP with the resulting matrix-accumulated K<sup>+</sup> being continuously restored via the Δμ<sub>H</sub>-driven K<sup>+</sup>/H<sup>+</sup> exchanger (Figure 3O, top). In the absence of K<sup>+</sup>, ATP synthase relies only on H<sup>+</sup>, thus obligating a greater contribution of the ΔpH component of the PMF to ATP synthesis (as evidenced by an additional matrix alkalization of 0.3 units which is not observed in the presence of K<sup>+</sup>) (Figure 3O, bottom; see also Discussion). The presence of any significant inner membrane K<sup>+</sup> leak pathway (e.g., through an unspecified channel) can be ruled out as an explanation for this K<sup>+</sup> influx since it would have significantly uncoupled OxPhos, lowering RCR and P/O ratio in the presence of K<sup>+</sup>. Instead, OxPhos coupling was unaltered by K<sup>+</sup> presence, and the data is entirely consistent with K<sup>+</sup> transport through the ATP synthase driving the observed increase in ATP synthesis. Thus, there is excellent agreement between the functional data obtained from purified F<sub>1</sub>F<sub>0</sub> single molecule experiments and ATP synthase studied in the intact mitochondrion. Altogether, these results are fully consistent with predictions arising from experiments performed with purified ATP synthase reconstituted into proteoliposomes and lipid bilayers. It is important to point out that this tight consistency of results obtained between the technically diverse range of experiments presented here (i.e., from single molecule to intact organelle approaches) *rules out* that the behavior of purified, isolated F<sub>1</sub>F<sub>0</sub> develops an artifactual K<sup>+</sup> conductance (e.g., due to some *hypothetical* loss of an important regulatory component, etc.), because ATP synthase undoubtedly remains naturally and functionally unaltered in the intact mitochondrial experiments.

### **F<sub>1</sub>F<sub>0</sub>-mediated mitochondrial K<sup>+</sup> influx regulates respiration and mitochondrial volume in cells**

The data presented so far indicate that K<sup>+</sup> flux-driven ATP synthesis can proceed with PL- and single molecule-reconstituted purified F<sub>1</sub>F<sub>0</sub>, as well as in isolated mitochondria, in addition to that normally achieved directly by the flux of a H<sup>+</sup> gradient. Additionally, in the presence of KCOs F<sub>1</sub>F<sub>0</sub> achieves a proportionally greater flux of K<sup>+</sup> ions suggesting that it may function as a recruitable mK<sub>ATP</sub>.

To investigate whether these findings also apply to living cells we examine each one of the following manifestations of mK<sub>ATP</sub> activation in cardiomyocytes in response to KCOs, based on previous work by others (Garlid et al., 2003; Halestrap, 1989; Sato et al., 1998) and our group (Juhaszova et al., 2004; Juhaszova et al., 2009): (1) flavoprotein (FP) oxidation, (2) modulation of mitochondrial regulatory swelling (i.e., due to mitochondrial K<sup>+</sup> accumulation), (3) volume activation of respiration (as a consequence of #2), (4) inhibition of GSK-3β activity via ser-9 phosphorylation, and (5) increased mPTP reactive oxygen species (ROS)-threshold. We tested mK<sub>ATP</sub> activation by Dz in myocytes with IF<sub>1</sub> knocked down by ~75% through gene silencing (Figures 4B,C), compared to cells treated with control



siRNA (Figures 4A,C. Dz produced an equivalent increase in FP oxidation in control myocytes (Figure 4D) as compared to a blunted FP response from IF<sub>1</sub> siRNA treated cells (Figure 4E), consistent with F<sub>1</sub>F<sub>0</sub>

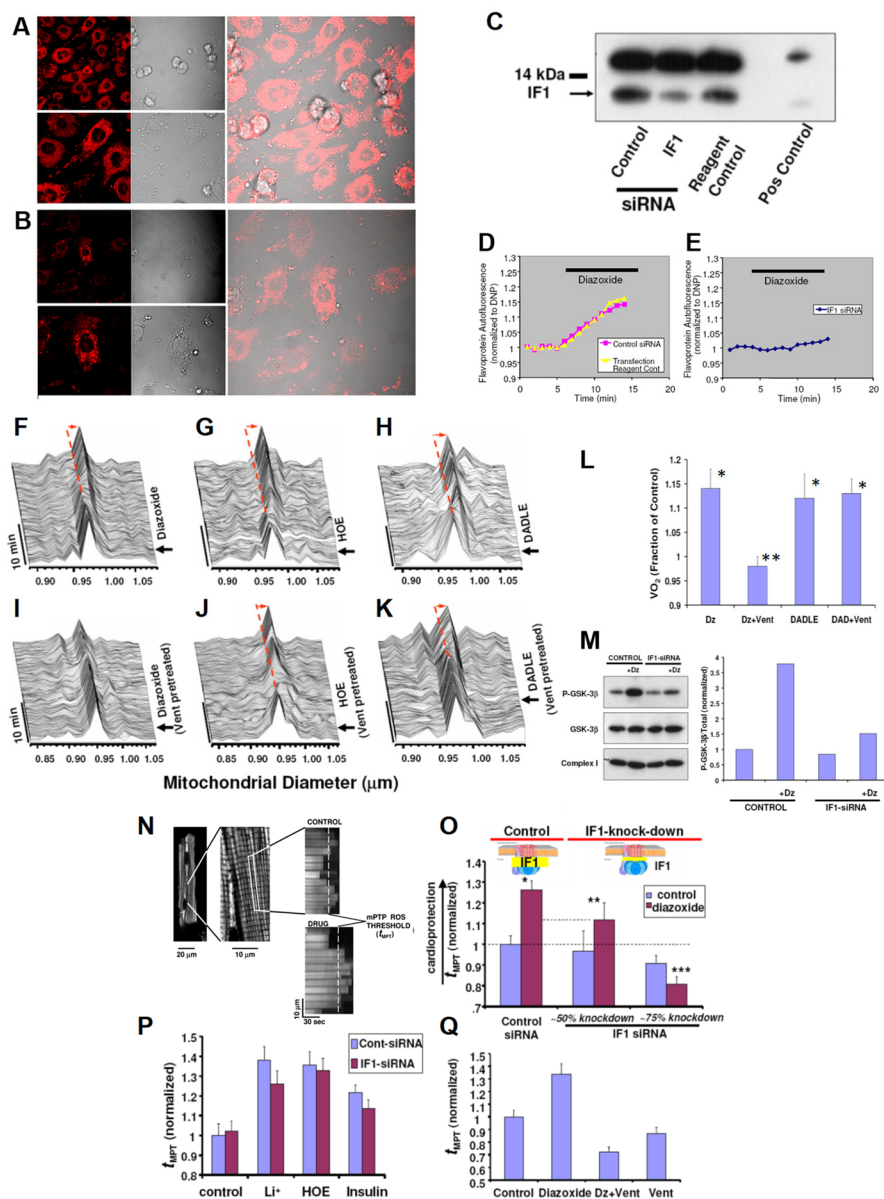

**Figure 4.** Knockdown of IF<sub>1</sub> expression in neonatal cardiomyocytes using RNA interference. (A) IF<sub>1</sub> immunocytochemical labeling of control, and (B) IF<sub>1</sub> siRNA treated cells. (C) Western blot analysis of control vs siRNA treated samples; positive control corresponds to adult rat heart. (D;E) FP autofluorescence (normalized to dinitrophenol, DNP) as marker of mKATP activity. (D) Dz induced FP oxidation in control, and (E) No effect of DZ was observed in IF<sub>1</sub> siRNA treated cells. (F-K) *In situ* monitoring of the amplitude and kinetics of regulatory mitochondrial swelling (resulting from increased mitochondrial K<sup>+</sup> influx and/or retention) in intact cardiomyocytes, based on Fourier analysis of laser linescan transmittance imaging. (F) KCO, Dz; (G) The NHE-1 inhibitor, HOE, and (H) the  $\delta$ -opioid peptide, DADLE, induced mitochondrial swelling. (I) The F<sub>0</sub> inhibitor, Vent, blocked Dz-induced mitochondrial swelling, while it had no effect on swelling induced by (J) HOE or (K) DADLE. Arrow indicates the time point of drug addition. (L) Mitochondrial respiration (indexed by oxygen consumption, VO<sub>2</sub> with respect to Dz and Vent treatment as in (D)) in myocytes. (M) mKATP (Dz)-protection signaling via GSK-3 $\beta$  requires IF<sub>1</sub> (see text for details). While the KCO, Dz, causes a robust increase in P-GSK-3 $\beta$  in control cells, this was largely prevented in IF<sub>1</sub>-siRNA treated cells. (N) Measurements of the mitochondrial permeability transition ROS threshold (t<sub>MPT</sub>, the index of cardioprotection) in myocytes (used in O-Q); typical positive t<sub>MPT</sub> effect of a drug is illustrated vs Control. (O) t<sub>MPT</sub> decreases in proportion to the degree of IF<sub>1</sub> knock-down, compared to control cells. (P) GSK-3 $\beta$ -dependent protection signaling which does not require mKATP activated K<sup>+</sup> flux (i.e., Li<sup>+</sup>, HOE, insulin) is unaffected by IF<sub>1</sub>-knock-down. (Q) Block of F<sub>0</sub> by Vent prevents mKATP (Dz)-mediated cardioprotection. \* P<0.05 vs paired Control; \*\*, \*\*\* P=ns vs paired Control.

functioning as a  $mK_{ATP}$  regulated by  $IF_1$ . KCO-driven activation of  $mK_{ATP}$  causes mitochondrial swelling (Garlid et al., 2003) and increases respiration (Halestrap, 1989; Korge et al., 2005). Using a single cardiac myocyte imaging technique (Juhaszova et al., 2004), we found that KCO Dz, HOE694 (HOE; NHE-1 inhibitor), and the  $\delta$ -opioid peptide, DADLE, each cause a rapid  $\sim 2.5$ -4% increase in the average volume of mitochondria throughout the cardiomyocyte and increase in respiration (Figures 4F-K,L). In cardiac myocyte suspension, we found that pharmacologic agents that cause mitochondrial swelling (Dz, HOE, and DADLE) increased oxygen consumption ( $VO_2$ ) over baseline by about 10%, 25-30%, and 35%, respectively, when utilizing glucose, the medium- and long-chain fatty acid octanoate or palmitate, respectively, and that by preventing this volume increase (e.g., using the  $Cl^-$  channel inhibitor, IAA-94), the accompanying increase in respiration was similarly eliminated (Juhaszova et al., 2004). Thus, volume activation of respiration is a direct correlate of mitochondrial regulatory volume swelling. Using the same logic as the preceding section, since DADLE causes similar and rapid increases in respiration (as Dz) but is known to *not* activate the  $mK_{ATP}$ , it was employed as a negative control in the next series of experiments. We found that Vent completely prevented the Dz-related increase in cardiomyocyte swelling and respiration (Figures 4I,L), while the actions of HOE or DADLE were unaffected (Figures 4J-L). Thus, only the specific effect of Dz acting through the  $mK_{ATP}$  causes mitochondrial swelling leading to an increase in respiration, but not that of DADLE, requires the function of  $F_o$ .

### Effects on mPTP ROS-threshold

The mPTP is a key end-effector of protection signaling: the threshold for mPTP-induction by ROS being significantly reduced after ischemia-reperfusion injury and contributing to cell death, but beneficially increased by preconditioning, postconditioning and other forms of protection signaling, contributing to cell survival (Juhaszova et al., 2004; Juhaszova et al., 2009). We showed that cell protection involves convergence of a multiplicity of potential and distinct upstream pathways (including opening of  $mK_{ATP}$ ), each acting via inhibition of GSK-3 $\beta$  on the end effector, the mPTP complex, to limit its induction (see Figure 4M). We have found that Dz, HOE,  $Li^+$  (the direct pharmacologic inhibitor of GSK-3 $\beta$ ), and insulin, each cause a significant increase of the ROS-threshold for mPTP induction,  $t_{MPT}$  (Juhaszova et al., 2004) (Figures 4N-Q). Since HOE,  $Li^+$  and insulin each cause protection via  $mK_{ATP}$ -independent mechanisms they were employed as negative controls in the next series of experiments. The degree of protection (i.e., prolonged  $t_{MPT}$ ) afforded by HOE,  $Li^+$ , and insulin was largely unaffected by  $IF_1$ -knockdown (Figure 4P). In stark contrast, the effect of Dz was decreased in direct relation to the degree of  $IF_1$ -knockdown, i.e.,  $t_{MPT}$ -increase was reduced by about half with  $\sim 50\%$   $IF_1$ -knockdown, and completely abolished with  $\sim 75\%$   $IF_1$ -knockdown (Figure 4O). We conclude that  $mK_{ATP}$ -related protection signaling to the mPTP requires the functional presence of  $IF_1$ , thus implicating the role of ATP synthase. Furthermore, similarly to  $IF_1$ -knockdown, Vent blocked the protection by Dz (Figure 4Q). However, while blockage of  $F_o$  by Vent prevents  $mK_{ATP}$  (Dz)-mediated cardioprotection, it does not do so in the case of DADLE or HOE.

### Regulation of $F_1F_o$ by Bcl-xL and Mcl-1

Suspecting that the effect of Dz and pinacidil via  $IF_1$  could be naturally operating under the control of yet-to-be discovered endogenous ligands of  $IF_1$  we set out to find them. We examined  $IF_1$  for conserved survival protein-related homology domains since  $IF_1$  is known to have a “minimal inhibitory domain” sequence of 33 amino acids that binds to the  $\beta$ -subunit of  $F_1$  (Gledhill et al., 2007). We found that  $IF_1$  contains a conserved BH3-like domain (residues 32-46) that significantly overlaps its minimal inhibitory

sequence (residues 14-47) (Figure 5A), and that Bcl-xL and Mcl-1, which are each known to have a BH3-

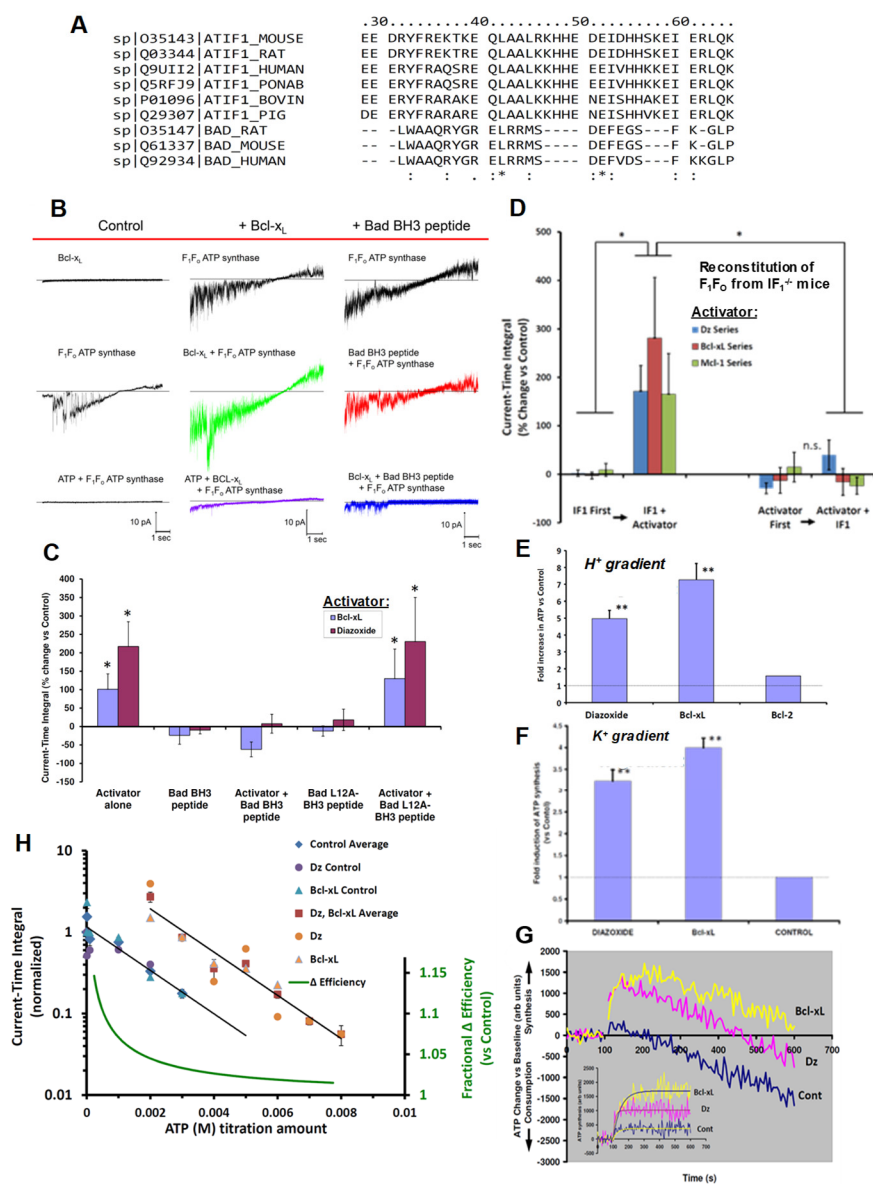

**Figure 5.** Regulation of F<sub>1</sub>F<sub>o</sub> current and activity by Dz, Bcl-2 family peptides and proteins mediated by IF<sub>1</sub>. (A) AA alignment of the 26-residue BAD BH3 peptide and F<sub>1</sub>F<sub>o</sub> inhibitory factor IF<sub>1</sub> from mouse, rat, bovine, pig, monkey and human. The consistency of the alignment is indicated in the last row (asterisk shows complete conservation) (see also Fig S6). BH3 peptide L12 aligns with L42 in full length IF<sub>1</sub>. (B) Effect of Bcl-xL (20 nM) and BH3 peptide (20 nM) on the voltage ramp (from -60 mV to +60 mV) evoked F<sub>1</sub>F<sub>o</sub> currents. Column headers about the red line denote three experimental groups; Bcl-xL and BH3 peptide middle and right columns, respectively; control currents (left column). Bottom traces (left and middle) correspond to 2 mM ATP inhibited F<sub>1</sub>F<sub>o</sub> current. (C) Augmentation of the current-time integral of voltage ramp evoked F<sub>1</sub>F<sub>o</sub> currents by Bcl-xL and Dz (30 μM) is reversed by a 26 AA peptide consisting of the BH3-domain of Bad. Control peptide with a single AA substitution L12A has no effect. (D) Reconstitution of F<sub>1</sub>F<sub>o</sub> from IF<sub>1</sub><sup>-/-</sup> mice. Addition of IF<sub>1</sub> (100 nM) restores the stimulatory effect of Dz, Bcl-xL and Mcl-1 on the current-time integral of voltage ramp evoked F<sub>1</sub>F<sub>o</sub> currents from IF<sub>1</sub><sup>-/-</sup> mice. The order of addition of IF<sub>1</sub> and Dz, Bcl-xL or Mcl-1 is varied among the various groups as indicated. (E) F<sub>1</sub>F<sub>o</sub> activity (ATP synthesis) driven by a H<sup>+</sup> or (F) a K<sup>+</sup> gradient in PL. (G) ATP production/consumption kinetics (chemiluminescence traces) in a K<sup>+</sup> gradient in PL. (H) Dose-response of ATP inhibition of F<sub>1</sub>F<sub>o</sub> (H<sup>+</sup>) currents and Dz and Bcl-xL activated F<sub>1</sub>F<sub>o</sub> currents: *x-axis*-(linear) ATP concentration used for inhibition of F<sub>1</sub>F<sub>o</sub> currents, *y-axis* (log) normalized current-time integral of F<sub>1</sub>F<sub>o</sub> currents. Dz and Bcl-xL produced a parallel shift in the F<sub>1</sub>F<sub>o</sub> activity vs control resulting in the energy of an additional ~2.8 mM ATP being required to provide sufficient counter-torque to limit F<sub>1</sub>F<sub>o</sub> to the same level of function as under control conditions. The relative change in efficiency was calculated as the ratio of the free energy of ATP hydrolysis during activation by Dz and Bcl-xL over that under basal conditions. \* P<0.05, \*\* P<0.02.

binding groove, exert effects comparable to Dz on the H<sup>+</sup> and K<sup>+</sup> ion currents sustained by ATP synthase (Figures 5B,C). Furthermore, the effect of Bcl-xL and remarkably also of Dz, are reversed by a 26 AA peptide consisting of the BH3-domain of Bad (BH3 peptide, known to have nM affinity for Bcl-xL, but 1-2 orders less so for Bcl-2 (Kelekar et al., 1997; Petros et al., 2001)). A single AA substitution in the BH3 peptide (L12A), that reduces the affinity for Bcl-xL by almost 2 orders of magnitude (Wang et al., 2000), eliminated the inhibitory effects (Figure 5C). Notably, unlike Bcl-xL, Bcl-2 has no effect on F<sub>1</sub>F<sub>o</sub> H<sup>+</sup> and K<sup>+</sup> ion currents, which agrees with their known affinities for the BH3-domain of Bad, respectively. In binding experiments measuring changes in intrinsic tryptophan fluorescence, we found that Bcl-xL has a high affinity (sub-nM K<sub>d</sub>) for the ligand IF<sub>1</sub>, whereas Bcl-2's affinity is several orders of magnitude lower (see Supplement, section Protein binding (K<sub>d</sub>) measurements). This data suggests that IF<sub>1</sub> harbors a functionally-active BH3 domain homologous to that of Bad that overlaps with part of IF<sub>1</sub>'s inhibitory domain and functions as the area of binding to the β-subunit of F<sub>1</sub>. Additionally, Bcl-xL and Mcl-1, but not Bcl-2, serve as endogenous regulatory ligands of ATP synthase via interaction with IF<sub>1</sub> at the BH3-like domain.

### Regulation of ATP synthase by Bcl-xL, Mcl-1 and Dz requires IF<sub>1</sub>

Thus far, we have discussed the role and function of IF<sub>1</sub> in intact cells, organelles and purified single molecules of F<sub>1</sub>F<sub>o</sub>, as well as in IF<sub>1</sub>-knockdown experiments. Next, we examined the regulation of F<sub>1</sub>F<sub>o</sub> by Bcl-xL, Mcl-1 and Dz in the absence of IF<sub>1</sub>, and upon reconstitution with IF<sub>1</sub>. We measured H<sup>+</sup> and K<sup>+</sup> currents in F<sub>1</sub>F<sub>o</sub> isolated from IF<sub>1</sub><sup>-/-</sup> mice (see Supplement section: Generation of IF<sub>1</sub><sup>-/-</sup> mice, and Figure S5 regarding confirmatory proof of lack of IF<sub>1</sub> expression) and the baseline properties of the ionic currents were essentially like that of WT control. Importantly, upon reconstitution with IF<sub>1</sub>,  $P_H$  and  $P_K$  as well as total current reversal potential were found to be unchanged. One notable difference, however, was the ability of graded mM ATP amounts (by the energy transferred via its hydrolysis) to produce sufficient mechanical counter-torque (exerted by F<sub>1</sub> on the γ shaft) in excess of the oppositely-directed electrogenic mechanical torque exerted by F<sub>o</sub>, causing a net reversal of electrical current in the IF<sub>1</sub><sup>-/-</sup> case (resulting in ATP hydrolysis-generated reverse ion pumping). The latter (i.e., ATP-generated reverse ion pumping) was not observed in parallel experiments with WT and is entirely consistent with the known function of IF<sub>1</sub> to limit the waste of futile ATP hydrolysis by impaired mitochondria under circumstances when ΔΨ<sub>m</sub> would drop below levels needed to synthesize ATP (Walker, 1994).

Assessing the current-time integral function (CTI, which in the direction of negative current is the direct analog of the amount of ATP synthesized) after reconstitution of F<sub>1</sub>F<sub>o</sub> with IF<sub>1</sub> in IF<sub>1</sub><sup>-/-</sup>, we observed a small *increase* of ~11-14% in CTI (*vs* baseline). Thus, it is notable that IF<sub>1</sub> does not cause a *net* inhibitory drag on the energy transfer in F<sub>1</sub>F<sub>o</sub> likely due to frictional losses in the direction of ATP synthesis (see also discussion below regarding BH3 peptide effects). In contrast to WT, neither Dz, Bcl-xL nor Mcl-1 exerted a significant positive augmentation of CTI in the absence of IF<sub>1</sub>, and subsequent IF<sub>1</sub> reconstitution was similarly ineffective (Figure 5D). A likely explanation for the apparent ineffectiveness of IF<sub>1</sub> added after Bcl-xL, Mcl-1 or Dz can be given by the possible interference exerted by these molecules on the intrinsic disorder of IF<sub>1</sub> (Bason et al., 2014), hindering its interaction at the F<sub>1</sub>'s binding cleft and γ shaft into a functionally active complex. In one case, the 5-fold excess of IF<sub>1</sub> used leaves effectively no free Bcl-xL because of the high affinity of this pair, and presumably only free IF<sub>1</sub>, rather than bound, can reconstitute into F<sub>1</sub>F<sub>o</sub>. In the case of Dz, this molecule could directly affect the intrinsic disorder of IF<sub>1</sub> or the binding cleft preventing effective reconstitution. On the other hand, prior reconstitution of F<sub>1</sub>F<sub>o</sub> with IF<sub>1</sub> restores the WT behavior entirely, with Dz, Bcl-xL and Mcl-1 manifesting a robust augmentation of



CTI (Figure 5D). Taken together, this data allows us to conclude that IF<sub>1</sub> is required for these mediators to augment F<sub>1</sub>F<sub>o</sub> activity (for the same driving force).

As stated earlier, the positive effects of Bcl-xL and Mcl-1 on WT F<sub>1</sub>F<sub>o</sub> currents could be reversed by the BH3 peptide (but not by the L12A variant, null-acting control BH3 peptide). Since this BH3 peptide, as well as IF<sub>1</sub>, likely binds to the same region of F<sub>1</sub>-β, but because of its short length is unable to reach to the γ shaft, we examined the functional effects upon binding F<sub>1</sub>F<sub>o</sub> in the absence of IF<sub>1</sub>. We found that in IF<sub>1</sub>-deficient F<sub>1</sub>F<sub>o</sub>, the BH3 peptide alone exerts a robust positive effect comparable to that of Dz, Bcl-xL and Mcl-1 (i.e., doubling to tripling the activity; not shown), but the L12A-modified BH3 peptide had no effect, suggesting that IF<sub>1</sub> likely produces significant frictional drag via its constitutive contact with the γ shaft that is fully offset by some function-augmenting mechanism achieved by the portion of IF<sub>1</sub> bound to F<sub>1</sub>-β (see below and Discussion).

### Regulation of mechano-chemical efficiency of F<sub>1</sub>F<sub>o</sub>

We have shown that F<sub>1</sub>F<sub>o</sub>, conducting univalent cations at a fixed driving energy,  $\Delta\mu$ , can be upregulated to increase the total ion flux against a constant load without slip or leak via the IF<sub>1</sub>-dependent actions of synthetic small molecules such as Dz and pinacidil, and endogenous proteins such as Bcl-xL and Mcl-1. The absence of slip is revealed by complete inhibition of currents at high  $\Delta\mu$  by excess ATP. This activity enables ATP synthase to function as a recruitable mK<sub>ATP</sub>, whereby the triggered increase of mitochondrial K<sup>+</sup> influx and matrix volume upregulate respiration and produce redox activation of local signaling inhibiting GSK-3β and resulting in desensitization of the mPTP to damaging levels of ROS (Juhaszova et al., 2004; Zorov et al., 2014). These data, together with the results showing that Bcl-xL and Dz (and pinacidil and Mcl-1) are each capable of increasing the amount of ATP synthesized by reconstituted F<sub>1</sub>F<sub>o</sub> (WT, IF<sub>1</sub>-competent) utilizing either K<sup>+</sup> or H<sup>+</sup> gradients (Figures 5E-G), suggest that these IF<sub>1</sub>-dependent effectors have increased the mechano-chemical efficiency of the ATP synthase. To investigate this, we examined the titration curve of the CTI (at each of the ion-reversal potentials for H<sup>+</sup> and K<sup>+</sup>, in single ATP synthase molecules) as a function of the counter-torque on the γ shaft applied by F<sub>1</sub> resulting from the hydrolysis energy derived from increasing ATP concentrations, in the presence of Dz or Bcl-xL as compared to controls. The data obtained are well described by a log-linear relationship between CTI and [ATP]. Dz and Bcl-xL produced a parallel upward shift of 5.6-fold in the F<sub>1</sub>F<sub>o</sub> activity vs control (Figure 5H) indicating that the hydrolysis energy of an additional ~2.8 mM ATP is required to provide sufficient counter-torque to constrain the F<sub>1</sub>F<sub>o</sub> to the same level of function as under control conditions. Based on considerations of energy conservation, the additional ATP synthesis might be driven by extra energy that was not lost to viscous drag and intermolecular friction. Together, these results agree with the idea that both Bcl-xL and Dz increase the mechano-chemical efficiency of ATP synthase (e.g., by ~7% at 1 mM, ~5% at 2 mM, and ~3% at 4 mM ambient ATP).

### Discussion

Up to the present, it has been a central tenet of bioenergetics that mammalian ATP synthase operates solely on proton flux through F<sub>o</sub> to make ATP. The present work significantly revises that concept. We found that despite the high degree of F<sub>o</sub>'s H<sup>+</sup> selectivity vs. K<sup>+</sup> (~10<sup>6</sup>:1), the abundance of cytoplasmic K<sup>+</sup> over H<sup>+</sup> being >10<sup>6</sup>:1 enables ATP synthase to harness  $\Delta\mu_K$  (electrical gradient energy) and conduct a significant number of K<sup>+</sup> for every H<sup>+</sup> in the synthesis of ATP. Specifically, our finding is supported by the following evidence: 1) under physiological pH=7.2 and K<sup>+</sup>=140 mEq conditions, purified F<sub>1</sub>F<sub>o</sub> reconstituted in proteoliposomes exhibiting a stable (non-zero)  $\Delta\Psi_m$  in the presence of the K<sup>+</sup> gradient,



can synthesize ATP solely driven by the free energy stored in the experimentally-defined  $K^+$  gradient by up to  $\sim 3.5 K^+$  for every  $H^+$ ; 2) purely  $K^+$ -driven ATP synthesis from single  $F_1F_0$  molecules measured by bioluminescence photon detection could be directly demonstrated along with simultaneous measurements of unitary  $K^+$  currents by patch clamp, both blocked by specific  $F_0$  inhibitors, Vent/Oligo; 3) in the presence of  $K^+$ , compared to osmotically-matched conditions in which this cation is absent, isolated mitochondria display 3.5-fold higher rates of ATP synthesis, at the expense of 2.6-fold higher rates of oxygen consumption, these fluxes being driven by a 2.7:1  $K^+ : H^+$  stoichiometry; the excellent agreement between the functional data obtained from purified  $F_1F_0$  single molecule experiments and ATP synthase studied in the intact mitochondrion under unaltered OxPhos coupling by  $K^+$  presence, is entirely consistent with  $K^+$  transport through the ATP synthase driving the observed increase in ATP synthesis; 4) the chemo-mechanical efficiency of ATP synthase can be endogenously up-regulated by certain members of the Bcl-2 family, and pharmacologically by certain  $K^+$  channel openers, acting via  $IF_1$ , an intrinsic regulatory factor of ATP synthase, in a process that increases the monovalent cation conductance of  $F_1F_0$  while retaining its high degree  $H^+$ -selectivity.

As the currency of metabolic energy, the flux of ATP catalyzed by ATP synthase generates every day (in humans)  $\sim 2 \times 10^{26}$  ATP molecules, corresponding to a mass of about 80 kg. In other words, each day we synthesize and recycle the equivalent of our own body weight in ATP (Rich, 2003). In the human heart, the estimated daily amount of ATP generated (6 – 35 kg) is much more than its own weight ( $\sim 300$  g) (Ashrafian et al., 2007; Taegtmeier, 1994). This entails an extraordinary process of energy supply-demand matching which occurs at extremely high rates. The increase in energy demand from rest to maximal can be 5- to 10-fold in normal people, depending on the intensity of physical activity, and reach 20-fold in well-trained human athletes (Weibel and Hoppeler, 2005). We propose that the dynamic range of ATP synthesis flux enabled through the newly discovered  $K^+$  mechanisms described here are essential to fulfill to a great extent the broad span of energy demand needs, matched by the supply of a highly efficient mechanism of energy generation, and evolutionarily tuned by endogenous regulators from the Bcl2 family of proteins.

Although what we propose remains fully compatible with Mitchell's chemiosmotic mechanism ((Mitchell, 1961); reviewed in (Nicholls and Ferguson, 2013)), our findings have major bioenergetic implications. Electrophysiological measurements indicate that purified  $F_1F_0$  reconstituted into the lipid bilayer could conduct up to  $3.7 K^+$  for every  $H^+$ , in the absence of any other  $K^+$  conducting pathway as demonstrated in section **Measurement of unitary  $K^+$  and  $H^+$  currents from  $F_1F_0$** . The demonstration that  $F_1F_0$  in isolated mitochondria utilizes  $\sim 3 K^+$  for every  $H^+$  transferred, yielding  $\sim 2 K^+$  per ATP (based on 8 ions driving the *c*-ring per 3 ATPs in mammalian  $F_1F_0$  together with our measurement of  $\sim 3:1 K^+ : H^+$ ), indicates that ATP synthase acts as a  $K^+$ -uniporter, i.e., the primary way for  $K^+$  to enter mitochondria. In isolated mitochondria the major fraction of the total  $K^+$  flux (likely significantly exceeding 60% considering the accompanying large differences in matrix volume changes) is sustained by the ATP synthase (Figures 3G-O; Figure S4D), thus showing that  $F_1F_0$  is a major mitochondrial  $K^+$  influx pathway. Since  $K^+$  entry is directly proportional to ATP synthesis and regulates matrix volume and respiration, in turn it directs the matching between energy supply and demand. The  $K^+$  flux can be enhanced, halted, or even reversed depending on ATP concentration based on thermodynamic energy balance (and the function of  $IF_1$ ).

We show that  $F_1F_0$ , conducting  $H^+$  and  $K^+$ , can be upregulated (even at the same driving energy,  $\Delta\mu$ ) to increase the total ion-flux (at constant  $H^+ : K^+$ ) against a constant load without slip or leak via the  $IF_1$ -dependent actions of endogenous pro-survival proteins, Bcl-xL and Mcl-1, and of synthetic small molecules, Dz and pinacidil (Figure 5; conceptualized in Figure 6C). By harnessing  $\Delta\mu_K$ , driven essentially by  $\Delta\Psi_m$ , and continuously converted (restored) from respiratory chain-generated  $\Delta\mu_H$  through

the activity of the KHE,  $F_1F_0$  generates additional ATP proportional to the amount of energy that would have been dissipated as heat by the same  $K^+$  current in passing (in a hypothetical scenario) through a separate entity functioning only as a  $K^+$  uniporter. In other words, letting  $K^+$  enter via a non-ATP generating process would not be as energetically effective as using the  $F_1F_0$  as the  $K^+$ -influx mechanism.

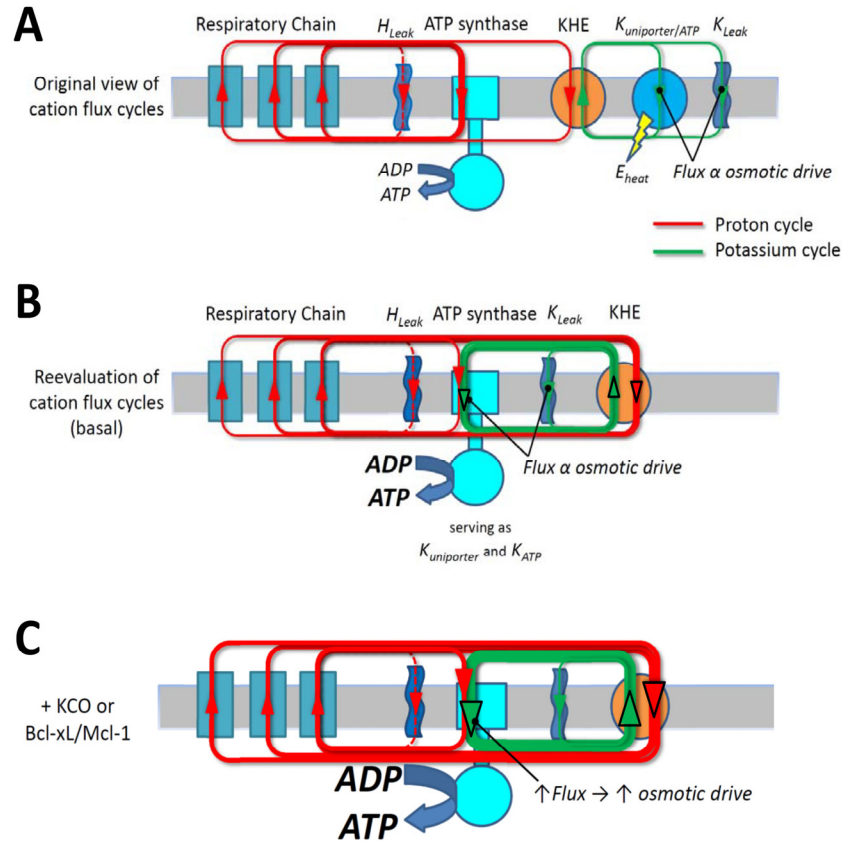

**Figure 6.** Scheme of the  $H^+$  and  $K^+$  transport across the inner mitochondrial membrane.

From the energetic standpoint, all the energy available to perform work and execute the ionic movements derives from the original  $H^+$  gradient established by proton pumps in the respiratory chain. A central point is the obligatory preservation of charge and mass balance under the steady state circuits. In the “original view of cation flux cycles” (A), a certain (majority) of the  $H^+$  gradient is being harnessed by  $F_1F_0$  directly to make ATP, whereas a certain amount of  $K^+$  is entering the matrix through an ordinary  $K^+$  channel mechanism (a “ $mK_{ATP}$ -uniporter” channel), driven by  $\Delta\Psi$ , and extruded via KHE utilizing the energy remaining in the fraction of the  $H^+$  gradient not harnessed by  $F_1F_0$ . The equivalent energy of this fraction being used to extrude  $K^+$ , and a large fraction of that non-ATP-producing energy would essentially be dissipated as heat in the constant cycle of  $K^+$  recirculation (green circuit in A). In the new mechanism (B) the same amount of energy available in the original  $H^+$  gradient but largely lost as heat is entirely available to produce ATP, simply by having the  $mK_{ATP}$ -uniporter mechanism reside inside, and as natural part of,  $F_1F_0$  with the traffic of  $H^+$  or  $K^+$  contributing its energy to producing ATP. The remainder of the  $H^+$  gradient energy is now utilized to remove all the  $K^+$  that entered via  $F_1F_0$  (n.b., this exchange process of extruding  $K^+$ , restoring  $\Delta\mu_K$ , is the way that the  $H^+$  gradient energy is still the original, entire driving force for ATP production). However, the gain is that more ATP is produced for the same input energy by not wasting some of that energy on maintaining what was originally thought to be a separate  $K^+$  cycle that does not/cannot generate any ATP. Engineered this way, it is a better, tightly coupled system of energy supply-demand matching through the  $K^+$  cycle utilizing  $F_1F_0$  because the matrix influx of  $K^+$  is truly directly proportional to ATP synthesis. Any transient increase in  $F_1F_0$  activity will thus lead to transient  $K^+$  accumulation (due to a natural kinetic lag in the activity increase in KHE reacting to the matrix  $K^+$  accumulation). This will lead to the attraction of a counter-ion and change of the osmotic drive yielding a “volume-activation of respiration” response which previously has been documented in detail (Juhaszova et al., 2004). The scheme depicted in (C) integrates the implications of modestly enhancing the chemo-mechanical efficiency of  $F_1F_0$  (by KCO’s or Bcl-xL/Mcl-1). For the driving energy of the same  $H^+$  gradient the  $F_1F_0$  flux increases, enabling increased respiration and a directly increased  $K^+$  flux cycle (yielding an increased volume signal) and enhanced ATP generation (C) vs the basal conditions (B).

Thus, once the  $K^+$  is eventually extruded by the KHE using  $H^+$  influx, the equivalent energy of that  $H^+$  will have been harnessed in form of ATP made by the  $K^+$  influx through the  $F_1F_o$  (Figure 6B).

Because a transient change in  $K^+$  influx would need to be matched by influx (or retention) of a counter-ion (e.g.,  $Cl^-$ ) to produce an osmotic imbalance signal, both KHE and the counter-ion transport pathways are also important control steps in matrix volume regulation. Dysfunction of mitochondrial KHE activity leads to aberrations in matrix  $K^+$  and mitochondrial volume regulation that in turn may affect fission/fusion and mitophagy. Such pathology is evident in the Wolf-Hirschhorn syndrome, a genetic insufficiency of mito-KHE activity (1/50,000 incidence, characterized by microcephaly, growth retardation, intellectual disability, and epileptic seizures among other severe manifestations (Zotova et al., 2010)).

The  $K^+$  uniporter function also enables  $F_1F_o$  to operate as an on-demand, recruitable  $mK_{ATP}$ , whereby triggered increases of mitochondrial  $K^+$ -influx and matrix-volume upregulate the signaling cascade resulting in desensitization of the mPTP, enhancing cell survival (Juhaszova et al., 2004). Nature usually operates important pathways with built-in redundancy so that other mitochondrial  $K^+$  channels may contribute to these mechanisms, including the  $Ca^{2+}$ -activated  $K^+$  channel,  $BK_{Ca}$  (Xu et al., 2002), and a ROMK channel which may also mimic  $mK_{ATP}$  channel function (Foster et al., 2012), but these pathways are likely fine-tuning mechanisms.

Our data also unveil that  $F_1F_o$  operates at increased efficiency (by up to  $\sim 7\%$  at normal ATP levels) in response to KCOs, Bcl-xL and Mcl-1, yielding both increased ATP output and matrix  $K^+$  influx for the same  $\Delta\mu_H$  (Figure 5; depicted in 6C). Dz and Bcl-xL cause a rightward shift in the ATP-dependence of the CTI (a quantitative index of ATP synthesis), such that the hydrolysis energy of an additional  $\sim 2.8$  mM ATP is required to provide enough counter-torque to constrain the  $F_1F_o$  to the same level of function as in controls. This means that an additional  $\sim 2.8$  mM ATP can be produced for the same input energy at normal ambient levels of ATP. This provides quantitative proof that both Bcl-xL and Dz increase the mechano-chemical efficiency of  $F_1F_o$  (Figure 5H). Recent work found that Bcl-xL interacts with the  $F_1F_o$  (Alavian et al., 2011; Formentini et al., 2014), specifically with the  $\beta$ -subunit of ATP synthase decreasing an ion leak within the  $F_1F_o$  complex and concluded that this was responsible for increasing net transport of  $H^+$  by  $F_1F_o$  (Alavian et al., 2011). These latter findings and conclusions are non-trivially different from our experiments: (1) we do not observe ion leak (or slip) at all, regulated or otherwise, in  $F_1F_o$  in the presence or absence of Bcl-xL, i.e., Bcl-xL does not inhibit an ion leak that is not present in ATP synthase, and (2) the increase in ATP synthetic capacity in response to Bcl-xL is specifically due to an increase in mechano-chemical efficiency of ATP synthase *per se*, and not by changing an ion leak into useful energy. These latter findings lead us to conclude that essential mitochondrial homeostatic and pro-survival mechanisms result from a regulated  $IF_1$ -mediated increase in chemo-mechanical efficiency of  $F_1F_o$  conducting both  $K^+$  and  $H^+$ . Our results add a significant dimension to the known, and apparently diverse biological function sets of  $F_1F_o$ . Additionally, it was proposed that a certain triggered rearrangement of  $F_1F_o$  dimers is functionally responsible for other major biological functions such as the mitochondrial cristae arrangements (Strauss et al., 2008) and possibly the formation of the mPTP (Giorgio et al., 2013).

Our findings raise the question of how  $IF_1$  might control the activity of ATP synthase to engage physiologic/homeostatic and survival-promoting mechanisms. Overall, our data are consistent with a “minimal inhibitory domain” of  $IF_1$  (residues 14-47 in bovine  $IF_1$  (van Raaij et al., 1996)) binding to the  $\beta$ -subunit of  $F_1$  in an “ $IF_1$  ligand-binding cleft” (adjacent to the  $F_1$   $\alpha$ -subunit interface), forming at its proximal end an  $\alpha$ -helix loop that interacts with the  $F_1$   $\gamma$ -rotor shaft which is responsible for limiting ATPase activity. With the evidence of a significant modulatory role by certain Bcl-2 members, we examined this domain for conserved survival protein-related homology domains. Bcl-xL and Mcl-1 are each known to have a BH3-binding groove with high affinity for certain domains of BH3. Together with

the result of the high affinity binding of IF<sub>1</sub> to Bcl-xL, our data agrees with IF<sub>1</sub> harboring a functionally-active BH3-like domain homologous to that of Bad and coincident with IF<sub>1</sub>'s inhibitory domain that

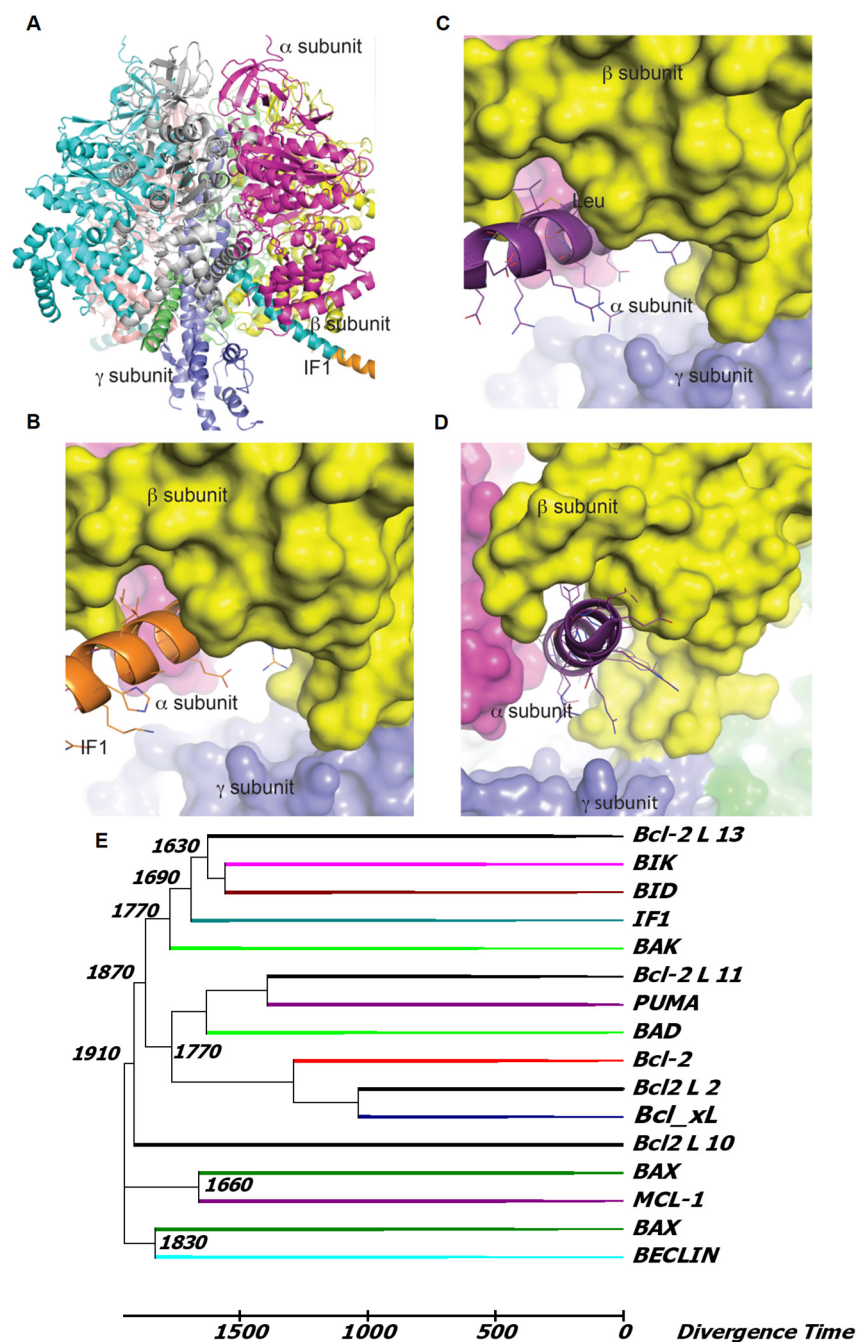

**Figure 7.** Interaction of F<sub>1</sub> ATPase with IF<sub>1</sub> or a BH3 modeled peptide. (A) Ribbon model of the crystal structure of bovine F<sub>1</sub> (PDB ID 4Z1M) emphasizing two of the three  $\beta$  subunits (cyan and magenta) and the  $\gamma$  subunit (blue) in interaction with the long  $\alpha$ -helix of the inhibitor protein IF<sub>1</sub> (orange). The IF<sub>1</sub> domain (residues 18-51) are shown in cyan; residues 23-70 from PDB ID 1GMJ are shown in orange) interacts with the  $\beta$  subunit marked in yellow. (B) Surface representation of subunits  $\beta$  (yellow),  $\gamma$  (blue) and  $\alpha$  (magenta) of F<sub>1</sub> ATPase interacting with IF<sub>1</sub> peptide. (C) As panel (B) with the  $\alpha_2$ -helix peptide containing BH3 domain from the BAD protein (PDB ID 1G5J), as it binds BCL-XL) in ribbon representation at the IF<sub>1</sub> groove in F<sub>1</sub> showing the aliphatic side chain of Leu 42 in IF<sub>1</sub> and Leu 12 in BH3-BAD peptide (corresponding to Leu114 in human BAD). (D) Same as (C) at an approximately 90° orientation. (E) Phylogenetic tree of the BH3 extended peptides (35 residues) from Bcl-2 proteins and IF<sub>1</sub> across eukaryotes. Sequence alignment was computed with Clustal Omega (Sievers et al., 2011) and the tree and divergence times (in Myr) were calculated by MEGA 6.0 (for further details, see Supplemental Information; Figs S6 and S7, and Table S2).



functions as the binding patch to the  $\beta$ -subunit of  $F_1$ . Binding of Bcl-xL and Mcl-1, but not Bcl-2, via  $IF_1$  interaction, endogenously regulate  $F_1F_0$  activity. This may explain why the effects of Bcl-xL, Mcl-1, and Dz, are reversed by the BH3 peptide, but not by the same peptide with a single AA change (L12A) (Kelekar et al., 1997; Wang et al., 2000) (Figures 5B,C). Specifically, the BH3 peptide may compete and displace  $IF_1$  from its binding site on  $F_1F_0$ , as well as interfere with its binding to Bcl-xL or Mcl-1. Moreover, we have shown that, unlike in WT, neither Dz nor Bcl-xL significantly increased CTI in  $F_1F_0$  from  $IF_1^{-/-}$ . Alternatively, prior reconstitution of  $F_1F_0$  in the presence of  $IF_1$  entirely rescued the WT behavior, with both Dz and Bcl-xL strongly augmenting the ion currents (Figure 5D). These data allow us to conclude that the higher ATP synthase activity elicited by these effectors (for the same driving force) requires  $IF_1$ , and that the mere removal from its binding site does not suffice to enhance the enzyme activity. We propose that in the normal basal state  $IF_1$  has two mechanical and *nearly offsetting* effects on the function of ATP synthase operating in the synthesis direction: (1) a net *negative*, frictional drag-like effect of the  $IF_1$  molecule originating at its proximal end where it engages the  $\gamma$  shaft in its natural rotation, and (2) a net *positive* effect created somehow by the presence of the long  $\alpha$ -helical stretch that engages the  $IF_1$  binding cleft on  $F_1\text{-}\beta$ , the latter effect being mimicked by the BH3-peptide. It has been shown that Bcl-xL can interact forming 3D-domain swapped (3DDS) homodimers (O'Neill et al., 2006) as well as heterodimers with other survival-regulating proteins. These interactions can significantly affect the residual function of both partners (Rajan et al., 2015), and certain BH3-only proteins can bind to and partially unfold Bcl-xL, changing its interactions with other binding partners and thereby biasing cell survival-signaling (Follis et al., 2013). Thus our two-fold proposal implies that (1) Bcl-xL/Mcl-1 (via their intrinsic BH3-binding grooves) tightly bind to  $IF_1$  at its minimal inhibitory/BH3-like domain to displace it from its binding cleft at  $F_1\text{-}\beta$ , and (2) this interaction triggers a specific unfolding and rearrangement of the Bcl protein's  $\alpha_2$  helix, enabling an increase of its potential range-of-motion. This could allow the helix from the Bcl protein to participate in an energetically favorable rearrangement with  $F_1F_0$  by binding to the empty  $IF_1$  binding cleft. We propose a possible model of this interaction (Bcl-protein's  $\alpha_2$  helix containing its BH3 domain engaging the  $IF_1$  binding cleft on  $F_1\text{-}\beta$ ; Figures 7A-D) that would cause the Bcl-xL/Mcl-1-mediated increase of  $F_1F_0$  function in the presence of  $IF_1$ , analogous to that obtained with the BH3 peptide added to the  $IF_1$  deficient  $F_1F_0$  (Figure 5D). The mechanism by which a short  $IF_1$ /BH3-(like) helical-peptide structure occupying the natural  $IF_1$  binding groove can enhance the chemo-mechanical efficiency of  $F_1F_0$  is of considerable interest, but how it specifically works remains a matter of future study.

The origin of  $IF_1$  in relation to the evolution of  $F_1F_0$  is also an interesting question. There are conserved “ $IF_1$  domains” that can be found embedded in a variety of larger proteins across Archaea, Bacteria, and Eukaryotes (Geer et al., 2002), suggesting ancient origins for this domain. Although  $F_1F_0$  exists in all major lifeforms,  $IF_1$  as a separate entity is only known to regulate synthase function in Eukaryotes. It is tempting to speculate that when the early bacterium became a mitochondrion as a functional organelle of the eukaryotic cell, some 2 billion years ago, it brought along the genetic information for  $IF_1$ , which might have evolved to prevent the mitochondrion from wasteful ATP consumption in the host cell. We examined these bacterial  $IF_1$ -progenitors and they have regions homologous to the BH3-like domains that we found in eukaryotic  $IF_1$ 's. The Bcl family is also ancient, some 2 billion years extant and resident in eukaryotic lifeforms. Bayesian phylogenetic analysis shows that  $IF_1$  is an ancient member of the Bcl family and today may be most closely related to BH3-containing proteins (e.g., Bad, PUMA, Bcl-xL; Figure 7E). This may explain how the Bcl-2 protein family has come to regulate  $F_1F_0$  function as part of its repertoire of survival-regulating functions.

In conclusion, we demonstrated that  $F_1F_0$  utilizes the ion gradient energy not only of  $H^+$  but also of  $K^+$  to drive ATP synthesis. The essential mitochondrial homeostatic and pro-survival mechanisms discussed



here, including  $F_1F_0$  operation as a primary mitochondrial  $K^+$  uniporter to facilitate energy supply-demand matching, and as a recruitable  $mK_{ATP}$  channel to protect from pathological opening of the mPTP, result from regulated function of ATP synthase conducting both  $K^+$  and  $H^+$ . The specific mechanisms by which KCOs and certain Bcl-2 family proteins engage  $IF_1$  to produce an increase in the chemo-mechanical efficiency of ATP synthase will require additional investigation.

## Experimental procedures

**Detailed methods are available in the Supplemental Experimental Procedures.**

### Cell isolation, and purification, characterization and reconstitution of $F_1F_0$

Myocytes were isolated from neonatal and adult rat, and mouse hearts by enzymatic dissociation. Mice carrying an inactivated *Atp1f1* allele were obtained from the European Mouse Mutant Archive (EMMA), bred to homozygosity and are referred to as  $IF_1^{-/-}$  throughout the text.

$F_1F_0$  was purified according to manufacturer protocol (Mitosciences) and reconstituted into liposomes and planar lipid membranes.

### ATP measurements

Bioluminescent assays which employ the luciferin-luciferase ATP-dependent reaction were used to evaluate the ATP production by PL.

### Electrophysiological measurements

The Planar Lipid Bilayer workstations (Warner Instruments) were used to characterize electrophysiological properties of the reconstituted  $F_1F_0$ .

Simultaneous measurements of unitary  $K^+$  currents and single photon detection of ATP synthesis activity (bioluminescence) from reconstituted  $F_1F_0$  into a lipid hydrogel-hydrogel interface bilayer formed on a 30-50  $\mu m$  glass pipette are described in **the Supplemental Experimental Procedures**.

### Membrane potential measurements

The potential-sensitive fluorescent probe oxonol VI was used to monitor  $F_1F_0$ -generated  $\Delta\psi$  in a  $K^+$  gradient using a PTI spectrofluorometer (Photon Technology International Inc.)

### Confocal microscopy experiments

mPTP ROS-threshold induction, mitochondrial volume determination, FP autofluorescence measurements and immunofluorescence microscopy were performed as described before (Juhaszova et al., 2004; Zorov et al., 2000).

### Statistics

All experiments were performed at least in triplicate, with cell number greater than 12 in each independent experiment unless stated otherwise. All data are mean  $\pm$  SEM. Comparisons within groups were made by an appropriate one-way ANOVA or Student t test, and P value  $<0.05$  was considered as statistically significant.

### Author contributions

Conceptualization, M.J., D.B.Z. and S.J.S.; Methodology, M.J., E.K., H.B.N., K.W.F., L.M., M.A.A., S.C. and S.J.S.; Software, Y.Y., S.B.G. and S.C.; Formal Analysis, Y.Y., S.B.G., S.C. and S.J.S.; Investigation, M.J., E.K., D.B.Z., H.B.N., M.A.A. and S.C.; Resources, R.dC., L.M., S.B.G. and S.J.S.; Writing-Original Draft, S.J.S.; Writing-Review & Editing, M.J., E.K., D.B.Z., K.W.F., R.dC., S.B.G., M.A.A., S.C. and S.J.S.; Visualization, M.J., E.K., Y.Y., S.B.G., M.A.A., S.C. and S.J.S.; Supervision, S.J.S.

## Acknowledgments

We thank E.G. Lakatta for useful discussions, D. Boyer for animal husbandry, L. Rezanka for mice genotyping and M.J. del Hierro Sanchez for assistance in obtaining the transgenic IF<sub>1</sub><sup>-/-</sup> mice. This work was supported entirely by the Intramural Research Program, National Institute on Aging, NIH.

## Conflict of interest

The authors declare that they have no conflict of interest.

## References

- Abrahams, J.P., Leslie, A.G., Lutter, R., and Walker, J.E. (1994). Structure at 2.8 Å resolution of F<sub>1</sub>-ATPase from bovine heart mitochondria. *Nature* *370*, 621-628.
- Alavian, K.N., Li, H., Collis, L., Bonanni, L., Zeng, L., Sacchetti, S., Lazrove, E., Nabili, P., Flaherty, B., Graham, M., et al. (2011). Bcl-xL regulates metabolic efficiency of neurons through interaction with the mitochondrial F<sub>1</sub>F<sub>0</sub> ATP synthase. *Nat Cell Biol* *13*, 1224-1233.
- Ashrafian, H., Frenneaux, M.P., and Opie, L.H. (2007). Metabolic mechanisms in heart failure. *Circulation* *116*, 434-448.
- Bason, J.V., Montgomery, M.G., Leslie, A.G., and Walker, J.E. (2014). Pathway of binding of the intrinsically disordered mitochondrial inhibitor protein to F<sub>1</sub>-ATPase. *Proc Natl Acad Sci U S A* *111*, 11305-11310.
- Bednarczyk, P., Dolowy, K., and Szewczyk, A. (2005). Matrix Mg<sup>2+</sup> regulates mitochondrial ATP-dependent potassium channel from heart. *FEBS Lett* *579*, 1625-1632.
- Boyer, P.D. (1997). The ATP synthase--a splendid molecular machine. *Annu Rev Biochem* *66*, 717-749.
- Contessi, S., Metelli, G., Mavelli, I., and Lippe, G. (2004). Diazoxide affects the IF<sub>1</sub> inhibitor protein binding to F<sub>1</sub> sector of beef heart F<sub>0</sub>F<sub>1</sub>ATP synthase. *Biochem Pharmacol* *67*, 1843-1851.
- Cortassa, S., Aon, M.A., Marban, E., Winslow, R.L., and O'Rourke, B. (2003). An integrated model of cardiac mitochondrial energy metabolism and calcium dynamics. *Biophys J* *84*, 2734-2755.
- Couoh-Cardel, S.J., Uribe-Carvajal, S., Wilkens, S., and Garcia-Trejo, J.J. (2010). Structure of dimeric F<sub>1</sub>F<sub>0</sub>-ATP synthase. *J Biol Chem* *285*, 36447-36455.
- Cross, R.L., and Muller, V. (2004). The evolution of A-, F-, and V-type ATP synthases and ATPases: reversals in function and changes in the H<sup>+</sup>/ATP coupling ratio. *FEBS Lett* *576*, 1-4.
- Dahlem, Y.A., Horn, T.F., Buntinas, L., Gonoï, T., Wolf, G., and Siemen, D. (2004). The human mitochondrial KATP channel is modulated by calcium and nitric oxide: a patch-clamp approach. *Biochim.Biophys.Acta* *1656*, 46-56.
- Davies, K.M., Strauss, M., Daum, B., Kief, J.H., Osiewacz, H.D., Rycovska, A., Zickermann, V., and Kuhlbrandt, W. (2011). Macromolecular organization of ATP synthase and complex I in whole mitochondria. *Proc Natl Acad Sci U S A* *108*, 14121-14126.

- Diez, M., Zimmermann, B., Borsch, M., Konig, M., Schweinberger, E., Steigmiller, S., Reuter, R., Felekyan, S., Kudryavtsev, V., Seidel, C.A., et al. (2004). Proton-powered subunit rotation in single membrane-bound F<sub>0</sub>F<sub>1</sub>-ATP synthase. *Nat Struct Mol Biol* *11*, 135-141.
- Etzold, C., Deckers-Hebestreit, G., and Altendorf, K. (1997). Turnover number of Escherichia coli F<sub>0</sub>F<sub>1</sub> ATP synthase for ATP synthesis in membrane vesicles. *Eur J Biochem* *243*, 336-343.
- Feniouk, B.A., Kozlova, M.A., Knorre, D.A., Cherepanov, D.A., Mulkidjanian, A.Y., and Junge, W. (2004). The proton-driven rotor of ATP synthase: ohmic conductance (10 fS), and absence of voltage gating. *Biophys J* *86*, 4094-4109.
- Follis, A.V., Chipuk, J.E., Fisher, J.C., Yun, M.K., Grace, C.R., Nourse, A., Baran, K., Ou, L., Min, L., White, S.W., et al. (2013). PUMA binding induces partial unfolding within BCL-xL to disrupt p53 binding and promote apoptosis. *Nature chemical biology* *9*, 163-168.
- Formentini, L., Pereira, M.P., Sanchez-Cenizo, L., Santacatterina, F., Lucas, J.J., Navarro, C., Martinez-Serrano, A., and Cuezva, J.M. (2014). In vivo inhibition of the mitochondrial H<sup>+</sup>-ATP synthase in neurons promotes metabolic preconditioning. *EMBO J* *33*, 762-778.
- Foster, D.B., Ho, A.S., Rucker, J., Garlid, A.O., Chen, L., Sidor, A., Garlid, K.D., and O'Rourke, B. (2012). Mitochondrial ROMK channel is a molecular component of mitoK(ATP). *Circ Res* *111*, 446-454.
- Garlid, K.D., Dos Santos, P., Xie, Z.J., Costa, A.D., and Paucek, P. (2003). Mitochondrial potassium transport: the role of the mitochondrial ATP-sensitive K(+) channel in cardiac function and cardioprotection. *Biochim Biophys Acta* *1606*, 1-21.
- Geer, L.Y., Domrachev, M., Lipman, D.J., and Bryant, S.H. (2002). CDART: protein homology by domain architecture. *Genome Res* *12*, 1619-1623.
- Giorgio, V., von Stockum, S., Antoniel, M., Fabbro, A., Fogolari, F., Forte, M., Glick, G.D., Petronilli, V., Zoratti, M., Szabo, I., et al. (2013). Dimers of mitochondrial ATP synthase form the permeability transition pore. *Proc Natl Acad Sci U S A* *110*, 5887-5892.
- Gledhill, J.R., Montgomery, M.G., Leslie, A.G., and Walker, J.E. (2007). How the regulatory protein, IF(1), inhibits F(1)-ATPase from bovine mitochondria. *Proc Natl Acad Sci U S A* *104*, 15671-15676.
- Grigoriev, S.M., Skarga, Y.Y., Mironova, G.D., and Marinov, B.S. (1999). Regulation of mitochondrial KATP channel by redox agents. *Biochim Biophys Acta* *1410*, 91-96.
- Halestrap, A.P. (1989). The regulation of the matrix volume of mammalian mitochondria in vivo and in vitro and its role in the control of mitochondrial metabolism. *Biochim Biophys Acta* *973*, 355-382.
- Hille, B. (2001). *Ion Channels of Excitable Membranes*. (Sinauer Associates, Inc.).
- Jiang, M.T., Ljubkovic, M., Nakae, Y., Shi, Y., Kwok, W.M., Stowe, D.F., and Bosnjak, Z.J. (2006). Characterization of human cardiac mitochondrial ATP-sensitive potassium channel and its regulation by phorbol ester in vitro. *Am.J.Physiol Heart Circ.Physiol* *290*, H1770-H1776.
- Juhaszova, M., Wang, S., Zorov, D.B., Nuss, H.B., Gleichmann, M., Mattson, M.P., and Sollott, S.J. (2008). The identity and regulation of the mitochondrial permeability transition pore: where the known meets the unknown. *Ann N Y Acad Sci* *1123*, 197-212.
- Juhaszova, M., Zorov, D.B., Kim, S.H., Pepe, S., Fu, Q., Fishbein, K.W., Ziman, B.D., Wang, S., Ytrehus, K., Antos, C.L., et al. (2004). Glycogen synthase kinase-3beta mediates convergence of protection signaling to inhibit the mitochondrial permeability transition pore. *J Clin Invest* *113*, 1535-1549.
- Juhaszova, M., Zorov, D.B., Yaniv, Y., Nuss, H.B., Wang, S., and Sollott, S.J. (2009). Role of glycogen synthase kinase-3beta in cardioprotection. *Circ Res* *104*, 1240-1252.
- Junesch, U., and Graber, P. (1991). The rate of ATP-synthesis as a function of delta pH and delta psi catalyzed by the active, reduced H(+)-ATPase from chloroplasts. *FEBS Lett* *294*, 275-278.

- Kaim, G., and Dimroth, P. (1995). A double mutation in subunit c of the Na<sup>+</sup>-specific F1F0-ATPase of *Propionigenium modestum* results in a switch from Na<sup>+</sup> to H<sup>+</sup>-coupled ATP synthesis in the *Escherichia coli* host cells. *J Mol Biol* 253, 726-738.
- Kelekar, A., Chang, B.S., Harlan, J.E., Fesik, S.W., and Thompson, C.B. (1997). Bad is a BH3 domain-containing protein that forms an inactivating dimer with Bcl-XL. *Mol Cell Biol* 17, 7040-7046.
- Kluge, C., and Dimroth, P. (1993). Specific protection by Na<sup>+</sup> or Li<sup>+</sup> of the F1F0-ATPase of *Propionigenium modestum* from the reaction with dicyclohexylcarbodiimide. *J Biol Chem* 268, 14557-14560.
- Korge, P., Honda, H.M., and Weiss, J.N. (2005). K<sup>+</sup>-dependent regulation of matrix volume improves mitochondrial function under conditions mimicking ischemia-reperfusion. *Am J Physiol Heart Circ Physiol* 289, H66-77.
- Kuhlbrandt, W., and Davies, K.M. (2016). Rotary ATPases: A New Twist to an Ancient Machine. *Trends Biochem Sci* 41, 106-116.
- Leone, V., Pogoryelov, D., Meier, T., and Faraldo-Gomez, J.D. (2015). On the principle of ion selectivity in Na<sup>+</sup>/H<sup>+</sup>-coupled membrane proteins: experimental and theoretical studies of an ATP synthase rotor. *Proc Natl Acad Sci U S A* 112, E1057-1066.
- Mironova, G.D., Fedotcheva, N.I., Makarov, P.R., Pronevich, L.A., and Mironov, G.P. (1981). [Protein from beef heart mitochondria inducing the potassium channel conductivity of bilayer lipid membrane]. *Biofizika* 26, 451-457.
- Mironova, G.D., Negoda, A.E., Marinov, B.S., Paucek, P., Costa, A.D., Grigoriev, S.M., Skarga, Y.Y., and Garlid, K.D. (2004). Functional distinctions between the mitochondrial ATP-dependent K<sup>+</sup> channel (mitoKATP) and its inward rectifier subunit (mitoKIR). *J Biol Chem* 279, 32562-32568.
- Mironova, G.D., Skarga, Y.Y., Grigoriev, S.M., Negoda, A.E., Kolomytkin, O.V., and Marinov, B.S. (1999). Reconstitution of the mitochondrial ATP-dependent potassium channel into bilayer lipid membrane. *J Bioenerg Biomembr* 31, 159-163.
- Mitchell, P. (1961). Coupling of phosphorylation to electron and hydrogen transfer by a chemi-osmotic type of mechanism. *Nature* 191, 144-148.
- Nakae, Y., Kwok, W.M., Bosnjak, Z.J., and Jiang, M.T. (2003). Isoflurane activates rat mitochondrial ATP-sensitive K<sup>+</sup> channels reconstituted in lipid bilayers. *Am.J.Physiol Heart Circ.Physiol* 284, H1865-H1871.
- Nicholls, D.G., and Ferguson, S.J. (2013). *Bioenergetics4*. (Academic Press).
- Noji, H., Yasuda, R., Yoshida, M., and Kinosita, K., Jr. (1997). Direct observation of the rotation of F1-ATPase. *Nature* 386, 299-302.
- O'Neill, J.W., Manion, M.K., Maguire, B., and Hockenbery, D.M. (2006). BCL-XL dimerization by three-dimensional domain swapping. *J Mol Biol* 356, 367-381.
- Petros, A.M., Medek, A., Nettesheim, D.G., Kim, D.H., Yoon, H.S., Swift, K., Matayoshi, E.D., Oltersdorf, T., and Fesik, S.W. (2001). Solution structure of the antiapoptotic protein bcl-2. *Proc Natl Acad Sci U S A* 98, 3012-3017.
- Pogoryelov, D., Krah, A., Langer, J.D., Yildiz, O., Faraldo-Gomez, J.D., and Meier, T. (2010). Microscopic rotary mechanism of ion translocation in the F(o) complex of ATP synthases. *Nat Chem Biol* 6, 891-899.
- Rajan, S., Choi, M., Nguyen, Q.T., Ye, H., Liu, W., Toh, H.T., Kang, C., Kamariah, N., Li, C., Huang, H., et al. (2015). Structural transition in Bcl-xL and its potential association with mitochondrial calcium ion transport. *Sci Rep* 5, 10609.
- Rich, P. (2003). Chemiosmotic coupling: The cost of living. *Nature* 421, 583.

- Sato, T., O'Rourke, B., and Marban, E. (1998). Modulation of mitochondrial ATP-dependent K<sup>+</sup> channels by protein kinase C. *Circ Res* 83, 110-114.
- Sievers, F., Wilm, A., Dineen, D., Gibson, T.J., Karplus, K., Li, W., Lopez, R., McWilliam, H., Remmert, M., Soding, J., et al. (2011). Fast, scalable generation of high-quality protein multiple sequence alignments using Clustal Omega. *Mol Syst Biol* 7, 539.
- Soga, N., Kinoshita, K., Jr., Yoshida, M., and Suzuki, T. (2012). Kinetic equivalence of transmembrane pH and electrical potential differences in ATP synthesis. *J Biol Chem* 287, 9633-9639.
- Stock, D., Leslie, A.G., and Walker, J.E. (1999). Molecular architecture of the rotary motor in ATP synthase. *Science* 286, 1700-1705.
- Strauss, M., Hofhaus, G., Schroder, R.R., and Kuhlbrandt, W. (2008). Dimer ribbons of ATP synthase shape the inner mitochondrial membrane. *EMBO J* 27, 1154-1160.
- Symersky, J., Pagadala, V., Osowski, D., Krahn, A., Meier, T., Faraldo-Gomez, J.D., and Mueller, D.M. (2012). Structure of the c(10) ring of the yeast mitochondrial ATP synthase in the open conformation. *Nat Struct Mol Biol* 19, 485-491, S481.
- Taegtmeier, H. (1994). Energy metabolism of the heart: from basic concepts to clinical applications. *Curr Probl Cardiol* 19, 59-113.
- van Raaij, M.J., Orriss, G.L., Montgomery, M.G., Runswick, M.J., Fearnley, I.M., Skehel, J.M., and Walker, J.E. (1996). The ATPase inhibitor protein from bovine heart mitochondria: the minimal inhibitory sequence. *Biochemistry* 35, 15618-15625.
- Walker, J.E. (1994). The regulation of catalysis in ATP synthase. *Current opinion in structural biology* 4, 912-918.
- Wang, J.L., Zhang, Z.J., Choksi, S., Shan, S., Lu, Z., Croce, C.M., Alnemri, E.S., Korngold, R., and Huang, Z. (2000). Cell permeable Bcl-2 binding peptides: a chemical approach to apoptosis induction in tumor cells. *Cancer Res* 60, 1498-1502.
- Watt, I.N., Montgomery, M.G., Runswick, M.J., Leslie, A.G., and Walker, J.E. (2010). Bioenergetic cost of making an adenosine triphosphate molecule in animal mitochondria. *Proc Natl Acad Sci U S A* 107, 16823-16827.
- Wei, A.C., Aon, M.A., O'Rourke, B., Winslow, R.L., and Cortassa, S. (2011). Mitochondrial energetics, pH regulation, and ion dynamics: a computational-experimental approach. *Biophys J* 100, 2894-2903.
- Weibel, E.R., and Hoppeler, H. (2005). Exercise-induced maximal metabolic rate scales with muscle aerobic capacity. *J Exp Biol* 208, 1635-1644.
- Xu, W., Liu, Y., Wang, S., McDonald, T., Van Eyk, J.E., Sidor, A., and O'Rourke, B. (2002). Cytoprotective role of Ca<sup>2+</sup>-activated K<sup>+</sup> channels in the cardiac inner mitochondrial membrane. *Science* 298, 1029-1033.
- Zhang, D.X., Chen, Y.F., Campbell, W.B., Zou, A.P., Gross, G.J., and Li, P.L. (2001). Characteristics and superoxide-induced activation of reconstituted myocardial mitochondrial ATP-sensitive potassium channels. *Circ.Res.* 89, 1177-1183.
- Zorov, D.B., Filburn, C.R., Klotz, L.O., Zweier, J.L., and Sollott, S.J. (2000). Reactive oxygen species (ROS)-induced ROS release: a new phenomenon accompanying induction of the mitochondrial permeability transition in cardiac myocytes. *J Exp Med* 192, 1001-1014.
- Zorov, D.B., Juhaszova, M., and Sollott, S.J. (2014). Mitochondrial reactive oxygen species (ROS) and ROS-induced ROS release. *Physiol Rev* 94, 909-950.
- Zorov, D.B., Juhaszova, M., Yaniv, Y., Nuss, H.B., Wang, S., and Sollott, S.J. (2009). Regulation and pharmacology of the mitochondrial permeability transition pore. *Cardiovasc Res* 83, 213-225.



Zotova, L., Aleschko, M., Sponder, G., Baumgartner, R., Reipert, S., Prinz, M., Schweyen, R.J., and Nowikovsky, K. (2010). Novel components of an active mitochondrial K(+)/H(+) exchange. *J Biol Chem* 285, 14399-14414.
