# Supplementary material for: ATP synthase K+- and H+-flux drive ATP synthesis and enable mitochondrial K+-uniporter function
Source: bioRxiv or medRxiv preprint supplement (doi:10.1101/355776), 2019-04-22
Supplement: Supplementary file [file 355776-1.pdf]

# **ATP synthase K<sup>+</sup>- and H<sup>+</sup>-flux drive ATP synthesis and enable mitochondrial K<sup>+</sup>-uniporter function**

Magdalena Juhaszova,<sup>1,9</sup> Evgeny K obrinsky,<sup>1,9</sup> Dmitry B. Zorov,<sup>1,5,9</sup> H. Bradley Nuss,<sup>1</sup> Yael Yaniv,<sup>1</sup> Kenneth W. Fishbein,<sup>2</sup> Rafael de Cabo,<sup>3</sup> Lluís Montoliu,<sup>6</sup> Sandra B. Gabelli,<sup>4,7,8</sup> Miguel A. Aon,<sup>1</sup> Sonia Cortassa,<sup>1</sup> Steven J. Sollott<sup>1,\*</sup>

## **Supplemental Material**

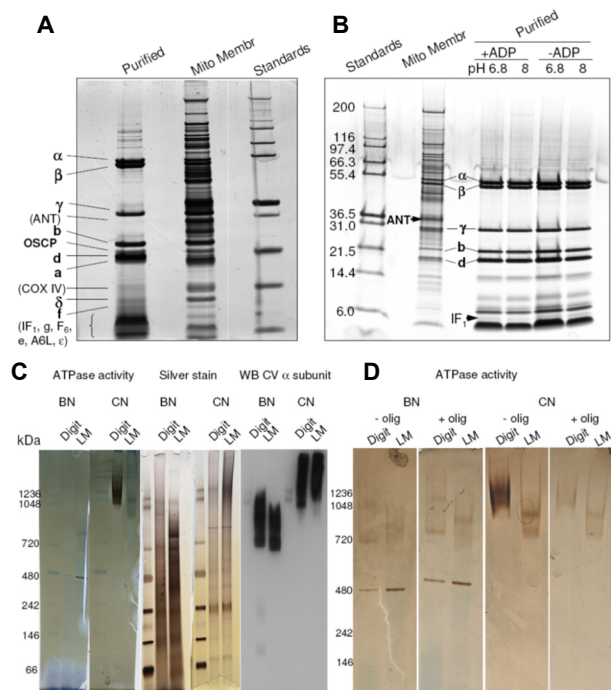

**Figure 1 – figure supplement 1. Purity and protein characterization of the isolated F<sub>1</sub>F<sub>0</sub> complex.** F<sub>1</sub>F<sub>0</sub> was purified according to manufacturer protocol (Mitosciences) and reconstituted into liposomes and planar lipid membranes. The purity of the enzyme complex was assessed by gel electrophoresis, silver staining and Western blotting (under denaturing conditions), which shows the absence of virtually all other unrelated mitochondrial proteins, including ANT, one of the most abundant inner mitochondrial membrane proteins (**A,B**). It has been suggested that mitochondrial ROMK potassium channel might act as the pore-forming subunit of the cytoprotective mKATP channel (Foster et al, 2012). Our immunoblotting with anti-ROMK antibody eliminated ROMK channel as a contaminant of the isolated F<sub>1</sub>F<sub>0</sub> (Figure 1-figure supplement 2C). The isolated F<sub>1</sub>F<sub>0</sub> showed monomers (~720 kDa) and dimers (possibly even higher order multimers) when run on Blue- and clear-native gels, although the “in-gel” oligomycin-sensitive ATPase activity, as seen in the clear-native gel, was largely restricted to the dimers and higher (**C,D**). Note that in the Blue-native gels, the charged dye Coomassie probably interferes with the in-gel ATPase assay. Also, the membrane solubilization detergents digitonin and lauryl maltoside yield different apparent ATPase activities. Importantly, the binding of the small (8 kDa) IF<sub>1</sub> to the synthase complex is reversible and pH-dependent, with approximately half of the IF<sub>1</sub> being bound at pH 8 as compared to pH 6.8 (**B**). The synthase complexes during and after isolation were maintained at pH 7 to keep IF<sub>1</sub> binding, except in protocols for which IF<sub>1</sub> was intentionally removed by a short wash in alkaline (pH 10) buffer.

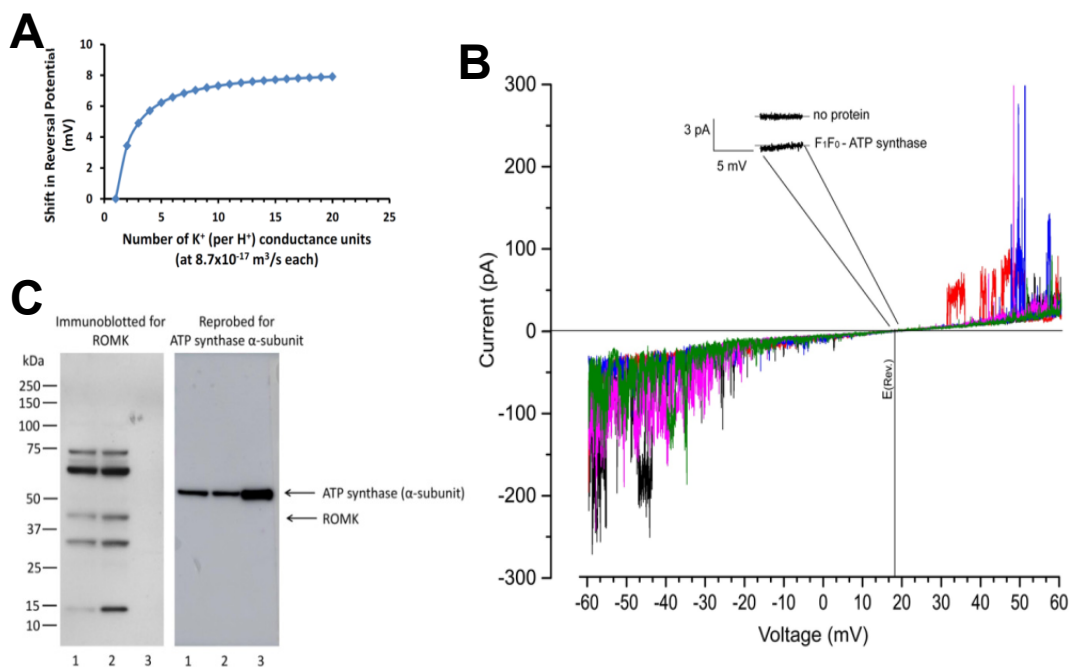

**Figure 1 - figure supplement 2. Absence of functionally relevant  $K^+/H^+$  antiport or independent  $K^+$  channel activity contaminating the  $F_1F_0$  proteoliposome (PL) reconstitution experiments.** (A) Shift in Reversal Potential ( $E_{rev}$ ) as a function of a hypothetical variation in the stoichiometry of  $F_1F_0$   $H^+$  conductance units vs number of  $K^+$  channels (“ $K^+$  conductance” units). All electrophysiological data confirms the absence of coincidental co-immunoprecipitation with a contaminating  $K^+$  channel (or a  $Na^+$  channel). The results of a calculation based on manuscript equation 1 show a theoretical shift in  $E_{rev}$  as a function of a hypothetical variation on the stoichiometry of “ $H^+$  conductance” and “ $K^+$  conductance” units: note that a ratio of 1:1 yields the obtained  $E_{rev}$  in the present experiments (a ratio of 1:0 represents the absence of a “ $K^+$  conductance unit” and  $E_{rev}$  will equal the reversal potential for  $H^+$  which is set by ionic conditions to be zero; this result has never been seen in any of our experiments). A ratio of 2:1 means two “ $K^+$  conductance” units per “ $H^+$  conductance”, and so on. If purified  $F_1F_0$  complex displayed a 2:1 ratio we would observe a  $\sim 3.5$  mV positive shift in  $E_{rev}$ , which was never observed. That  $E_{rev}$  is invariant from experiment to experiment (our resolution is  $< 1$  mV) confirms a fixed 1:1 stoichiometry. Furthermore, the  $K^+$  conductance is quantitatively inhibited in parallel with that of  $H^+$ , without any shifts in  $E_{rev}$ , by the titration with ATP (Figure 6D). Finally, the “ $H^+$  conductance” and “ $K^+$  conductance” units are all completely inhibited by both Oligo and Vent. If there was a contaminating  $K^+$  (or  $Na^+$ ) channel co-immunoprecipitated with  $F_1F_0$ , that channel activity would remain after these inhibitors, as we know of no  $K^+$  (or  $Na^+$ ) channels that are coincidentally *fully* sensitive and inhibited by Oligo and Vent, but such a residual channel activity never happens. Additionally, given the apparent 1:1 stoichiometry with  $F_1F_0$ , of such a hypothetical  $K^+$  (or  $Na^+$ ) channel, its abundance should be similar, for example, to the  $\gamma$ -subunit, but there is no such unidentified band of similar abundance in silver-stained gels run on the immunoprecipitated  $F_1F_0$  used in the present experiments (Figure 1 - figure supplement 1).

(B) **Biophysical evidence ruling out contamination of different  $K^+$  channels separate and distinct from  $F_1F_0$ .** Currents were recorded in  $F_1F_0$ -reconstituted bilayers in the voltage-ramp mode. Five random examples of the voltage-ramp data are given (depicted in different colors). Inset shows the current noise amplitude around  $E_{rev}$  with reconstituted  $F_1F_0$  which remains identical to that without reconstituted proteins. In the hypothetical scenario of the presence of a separate  $K^+$  channel distinct from  $F_1F_0$ , the noise amplitude at  $E_{rev}$  created by the continuous, independent channel-gating activities of the two putative independent channels (whose time-averaged currents exact summate to zero at  $E_{rev}$ ) would be significantly larger than pure bilayer noise, and distinct from  $F_1F_0$ . In contrast, if ions entering and turning the  $F_1F_0$  c-ring are sharing the common path for both  $K^+$  and  $H^+$  permeation, independent gating would not occur - there would be no channel-gating activity at all at  $E_{rev}$  - therefore, the noise amplitude at  $E_{rev}$  would be equivalent to that of the plain bilayer without reconstituted proteins. The absence of any channel-gating at  $E_{rev}$  (Figure inset) rules out the possibility that  $K^+$  is being conducted by a separate  $K^+$  channel co-immunoprecipitated with  $F_1F_0$ .

**(C) Immunocaptured F<sub>1</sub>F<sub>0</sub> is devoid of contamination with ATP-dependent ROMK potassium channel.** Immunoblot analysis of rat heart mitochondria (10 μg; lane 1), left ventricle tissue lysate (10 μg; lane 2) and immunocapture purified rat heart F<sub>1</sub>F<sub>0</sub> (~5 μg) separated on a NuPage 4-12% Bis-Tris gel prior to immunoblot assay and tested with anti-KCNJ1 (Sigma Prestige, anti-KCNJ1 Cat#:HPA026962; this antibody has been employed to identify mitochondrial ROMK channel by (Foster et al, 2012)), the blot was then re-probed with anti-ATP synthase subunit α antibody. Arrows point to location of the ROMK channel and the ATP synthase subunit α. While left ventricle and cardiac mitochondria extracts showed the expected weak but positive band ~45 kDa, there was no immunolabelling whatsoever in our F<sub>1</sub>F<sub>0</sub> complex. Thus there is no ROMK contaminating our preparations to yield any functional artefact.

## Supplementary file 1

### Quantitative comparison of H<sup>+</sup> and K<sup>+</sup> current magnitudes through ATP synthase

To compute the ratio of H<sup>+</sup> and K<sup>+</sup> currents through the ATP synthase we consider the contribution of each ion as described by the Goldman-Hodgkin-Katz formalism:

$$\frac{I_{H^+}}{I_{K^+}} = \frac{P_H Z_H^2 \frac{\Delta\Psi_m F^2}{RT} \left( \frac{[H]_i - [H]_0 \exp\left(\frac{-Z_H \Delta\Psi_m F}{RT}\right)}{1 - \exp\left(\frac{-Z_H \Delta\Psi_m F}{RT}\right)} \right)}{P_K Z_K^2 \frac{\Delta\Psi_m F^2}{RT} \left( \frac{[K]_i - [K]_0 \exp\left(\frac{-Z_K \Delta\Psi_m F}{RT}\right)}{1 - \exp\left(\frac{-Z_K \Delta\Psi_m F}{RT}\right)} \right)}$$

Taking the limit of the ratio of currents when  $\Delta\Psi_m$  tends to  $-\infty$ , i.e., in the direction of ATP synthesis,

$$\lim_{\Delta\Psi_m \rightarrow -\infty} \left( \frac{I_{H^+}}{I_{K^+}} \right) = \frac{P_H Z_H^2 \left( \frac{[H]_i - [H]_0 \exp\left(\frac{Z_H \infty F}{RT}\right)}{1 - \exp\left(\frac{Z_H \infty F}{RT}\right)} \right)}{P_K Z_K^2 \left( \frac{[K]_i - [K]_0 \exp\left(\frac{Z_K \infty F}{RT}\right)}{1 - \exp\left(\frac{Z_K \infty F}{RT}\right)} \right)}$$

the linear terms ( $[H]_i$ ,  $[K]_i$  and the 1 in the numerators and denominators, respectively), become negligible with respect to the exponential terms containing the dependence on  $\Delta\Psi_m$  as follows:

$$\lim_{\Delta\Psi_m \rightarrow -\infty} \left( \frac{I_{H^+}}{I_{K^+}} \right) = \frac{P_H Z_H^2 \left( \frac{\cancel{[H]_i} - [H]_0 \exp\left(\frac{Z_H \infty F}{RT}\right)}{\cancel{1} - \exp\left(\frac{Z_H \infty F}{RT}\right)} \right)}{P_K Z_K^2 \left( \frac{\cancel{[K]_i} - [K]_0 \exp\left(\frac{Z_K \infty F}{RT}\right)}{\cancel{1} - \exp\left(\frac{Z_K \infty F}{RT}\right)} \right)}$$

rendering

$$\lim_{\Delta\Psi_m \rightarrow -\infty} \left( \frac{I_{H^+}}{I_{K^+}} \right) = \frac{P_H Z_H^2 [H^+]_0}{P_K Z_K^2 [K^+]_0}$$

This limit will be (asymptotically) approached as the magnitude of  $\Delta\Psi_m$  increases, but under realistic ionic conditions, is practically achieved for  $|\Delta\Psi_m| \geq 100$  mV. The currents ratio through ATP synthase will be proportional to the ratio of extra-mitochondrial concentrations (in mole-equivalents) of  $[H^+] = 6.3 \times 10^{-8}$  over  $[K^+] = 0.137$ , at pH 7.2, corresponding to  $\sim 5 \times 10^{-7} : 1$ . This results in a ratio of  $H^+ : K^+$  currents  $\sim 1:4$  since the ratio of permeability  $P_H:P_K$  is equal to  $5.2 \pm 0.9 \times 10^{-11} : 8.7 \pm 2.9 \times 10^{-17}$  as determined in our experiments.

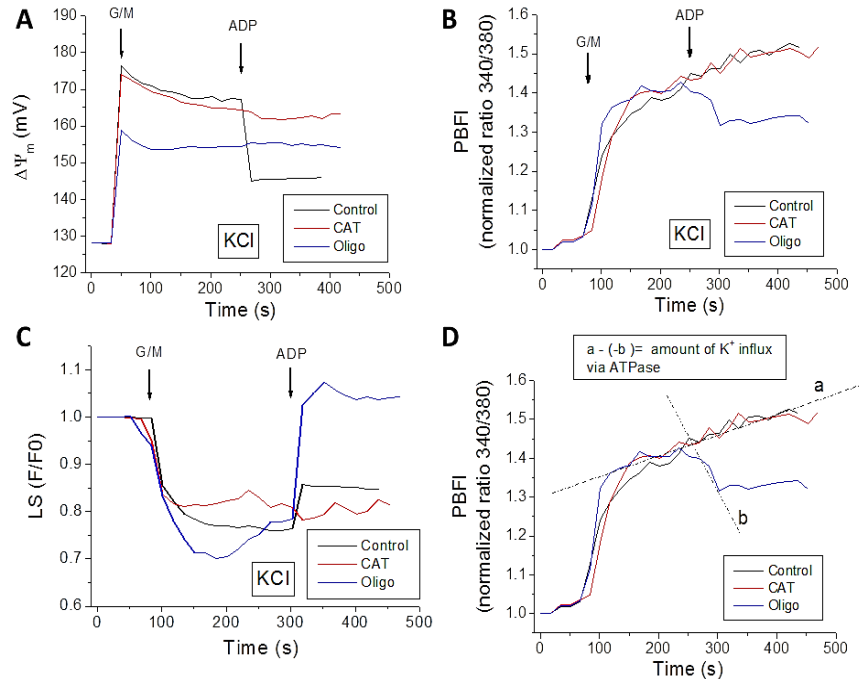

**Figure 4 - figure supplement 1.  $K^+$  fluxes during the state 4  $\rightarrow$  3 transition in isolated mitochondria from guinea pig heart.** Freshly isolated mitochondria loaded with 20  $\mu$ M PBFi-AM as described before (Aon et al, 2010) were preincubated in the absence (Control) or presence of 10  $\mu$ M oligomycin (Oligo) or 10  $\mu$ M carboxyatractyloside (CAT) (in the cuvette of the spectrofluorimeter, with stirring at 37°C for 3min) followed by energization with the  $Na^+$  salts of substrates glutamate/malate (G/M, 5 mM/5 mM) (state 4 respiration) and, subsequently, with 1mM ADP (state 3 respiration), added as indicated with arrows. Mitochondria were assayed in the same medium above described containing 137 mM KCl (instead of sucrose) and 2 mM Pi. Mitochondrial  $\Delta\Psi_m$  (A), PBFi (B) and swelling (light scattering, LS) (C), were monitored simultaneously as described above. (C, D) Volume changes during mitochondrial swelling-contraction, and of the  $K^+$  flux sustained by the ATP synthase in state 3 respiration, were estimated in control and oligomycin-preincubated mitochondria. The relative volume changes (measured as LS) were: *swelling* triggered by G/M ( $\sim 0.3$  for Oligo and  $\sim 0.2$  for control and carboxyatractyloside, CAT), and *contraction* by ADP ( $\sim 0.1$  for control and  $\sim 0.3$  for Oligo) additions (C). On these bases, the volume change quantification can be estimated considering that 1.77  $\mu$ l/mg mitochondrial protein (see (Aon et al, 2010) p.75, 2<sup>nd</sup> column, 2<sup>nd</sup> paragraph) correspond to the volume in state 4 respiration after G/M addition. A  $\Delta$ volume of 30% contraction after ADP addition can be estimated equivalent to 0.5  $\mu$ l/mg mito prot., thus from 1.77 to 1.24  $\mu$ l/mg mito protein, sustained by a  $K^+$  flux equivalent to 60% of the  $K^+$  flux at  $V_{max}$ .

(D) Estimation of the  $K^+$  flux sustained by the ATP synthase in state 3 respiration in the presence of Oligo: In KCl,  $V_{max}$  of  $K^+$  uptake rate =  $172 \pm 17$  nmol  $K^+$ /min/mg prot. (see Aon et al., 2010, their Figure 2A).

Slopes (PBFi ratio/min) = Control: 0.00102; +Oligo: - 0.00169

$dK^+/dt = \text{influx} - \text{efflux} = \text{flux balance from control}$ .

Flux balance from control + efflux = influx

$0.00102 + 0.00169 = 0.00271$  PBFi ratio/min =  $0.0183$  PBFi ratio/min/mg prot. (148  $\mu$ g mitochondrial prot. per assay)

$K^+$  flux =  $0.0183 * 1000/0.175 = 104$  nmol  $K^+$ /min/mg prot.

For a  $V_{max}$  uptake rate of  $K^+ = 172$  nmol/min/mg prot.; 104 nmol  $K^+$ /min/mg prot. represents 60% of the total  $K^+$  flux at  $V_{max}$ .

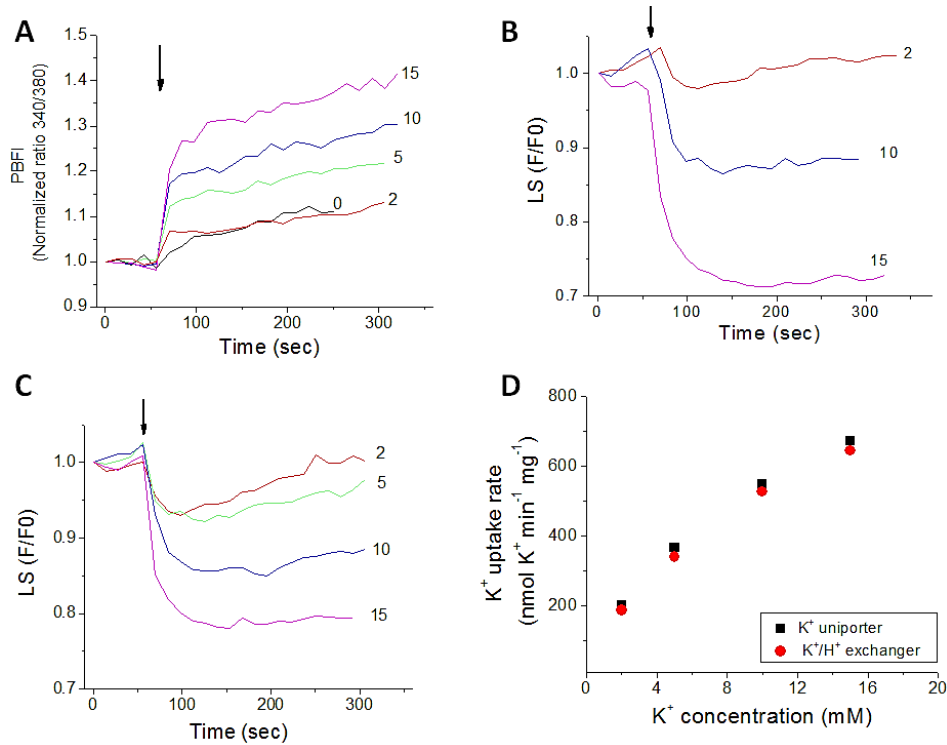

**Figure 4 - figure supplement 2. K<sup>+</sup> uniporter and K<sup>+</sup>/H<sup>+</sup> exchanger fluxes in the absence or presence of quinine in isolated mitochondria from guinea pig heart.**

Freshly isolated PBF1-loaded mitochondria were assayed for K<sup>+</sup> fluxes in the same medium described in the legend of Figure 4 - figure supplement 1, but containing 250 mM sucrose (instead of KCl), thus enabling us to study K<sup>+</sup> fluxes in a controlled fashion. After pulses of 2 to 15 mM KH<sub>2</sub>PO<sub>4</sub> (indicated by arrow), K<sup>+</sup> fluxes were quantified in mitochondria energized with the Na<sup>+</sup> salts of G/M (5 mM/5 mM), and in the absence (Control) or presence of 50 μM quinine, a K<sup>+</sup>/H<sup>+</sup> exchanger inhibitor (Garlid et al, 1986; Martin et al, 1986). Mitochondrial swelling (LS: B, C) and PBF1 fluorescence (A) were determined in control (B) and quinine-preincubated (A, C) mitochondria. Panel D depicts the K<sup>+</sup> fluxes sustained by the K<sup>+</sup> uniporter and the K<sup>+</sup>/H<sup>+</sup> exchanger as measured in the presence of quinine or its absence, respectively. The flux through the K<sup>+</sup>/H<sup>+</sup> exchanger was calculated as the difference between the fluxes measured in the presence of quinine (uniporter) minus in its absence (where both uniporter and exchanger are active).

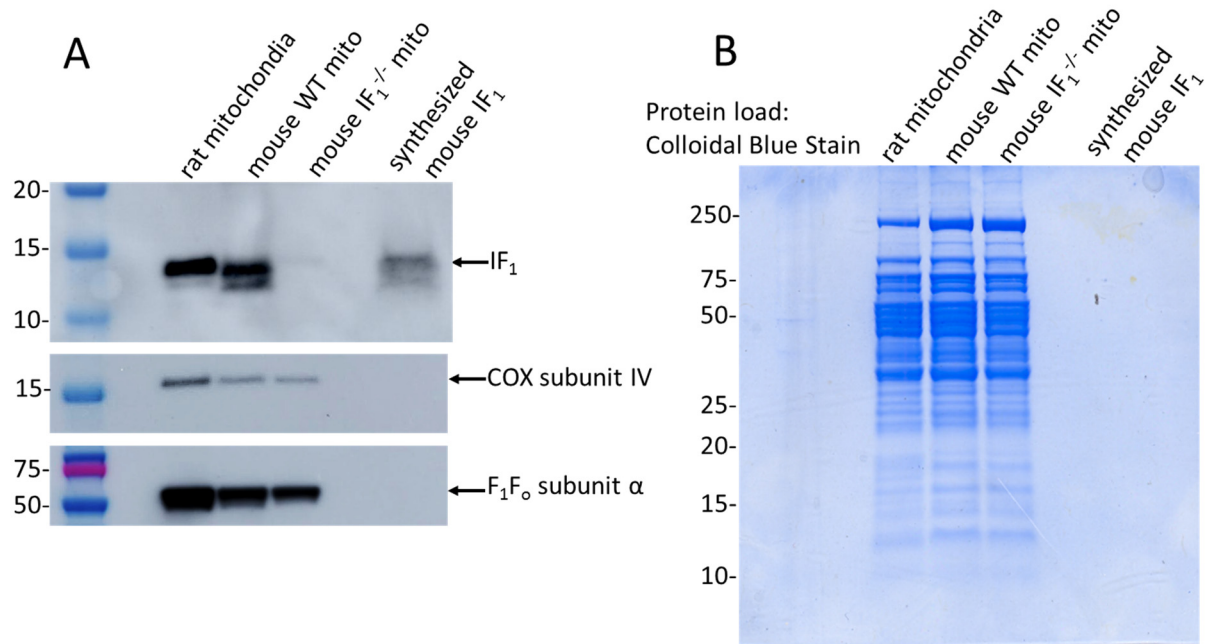

**Figure 5D-figure supplement 1. Phenotype verification of IF<sub>1</sub> KO mouse.** **A.** IF<sub>1</sub> protein expression was not detected by an anti-IF<sub>1</sub> antibody (Cell Signaling Technology) in IF<sub>1</sub><sup>-/-</sup> mouse mitochondria by western blotting while the blot was positive for IF<sub>1</sub> protein expression in rat and mouse wild type (WT) mitochondria (15 μg of proteins were loaded per well) and synthesized mouse IF<sub>1</sub> peptide (purified >98%; 50 ng). As expected, all three mitochondrial preparations showed the presence of other mitochondrial proteins (the same blot was reprobed for COX subunit IV (Cell Signaling Technology, clone 3E11) and F<sub>1</sub>F<sub>0</sub> subunit alpha (Abcam)). **B.** The gel was stained with Colloidal Blue Stain (Invitrogen) to demonstrate the equal total mitochondrial protein load into each well.

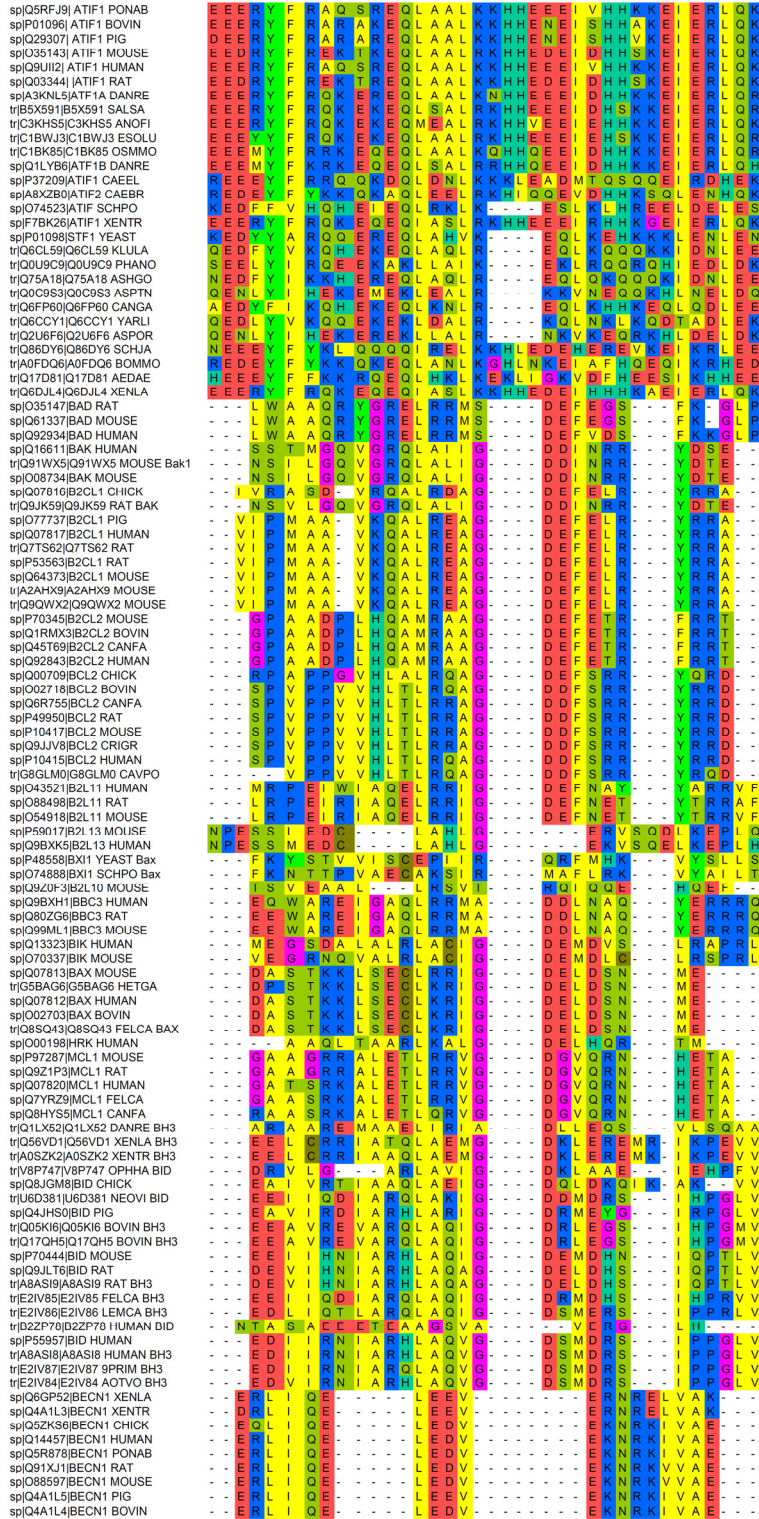

**Figure 8 - figure supplement 1. Multiple sequence alignment of BH3 motifs of Bcl-2 proteins and IF1.** The alignment was obtained with Clustal Omega. Details of the 107 sequences corresponding to fragments of the IF1 (28 correspond to IF1 sequences) and Bcl-2 family proteins are provided in Figure 8-Table supplement 1.



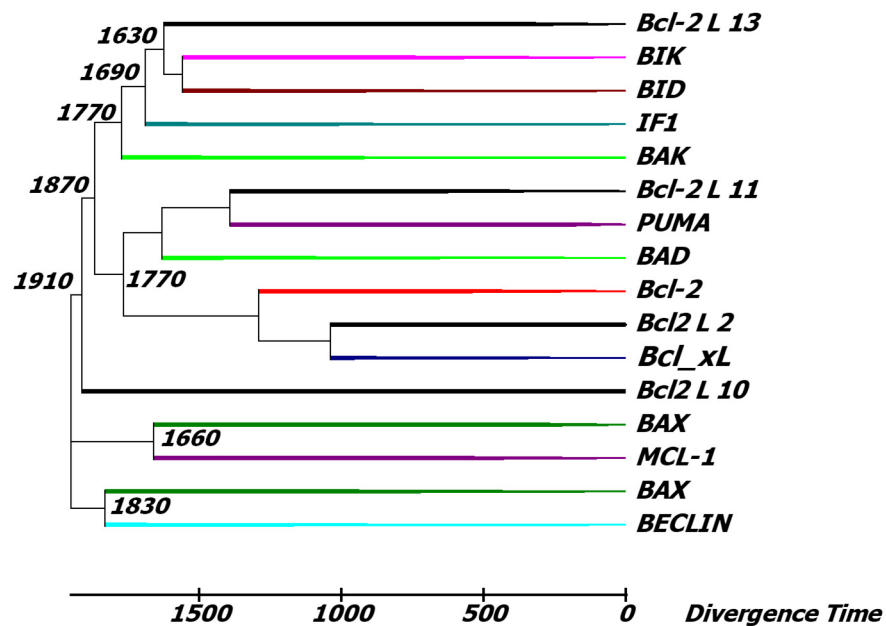

**Figure 8-figure supplement 2. Phylogenetic tree of IF1 and BH3 motif containing proteins.**

The tree was calculated with the Neighbor-Joining statistical method (Saitou & Nei, 1987) from the alignment performed by Clustal Omega (Figure 8-figure supplement 1). The calibration of the divergence times (in millions of years, Myr) was performed as described in Methods and to calculate the branching times the method RelTime (Tamura et al, 2012) was applied. Only positions with more than 95% site coverage were considered for the analysis, which in this case corresponds to 14 amino acids. The tree construction was performed with MEGA 6.0 (Tamura et al, 2013)

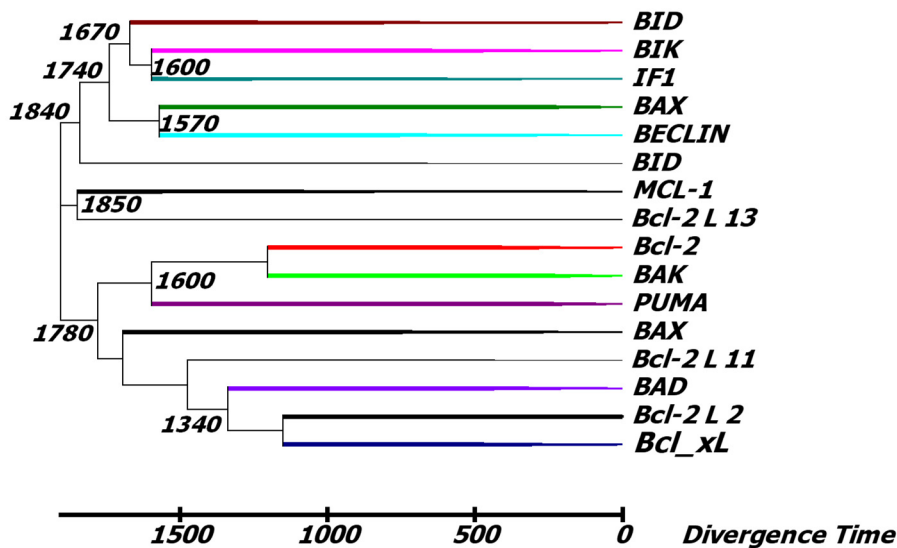

**Figure 8-figure supplement 3. Phylogenetic tree of IF1 and Bcl-2 protein BH3 motif containing fragments.** The tree was calculated with the Neighbor-Joining statistical method from the alignment performed by Bali-Phy with a LG substitution model (Le & Gascuel, 2008) and the Insertion/deletion model RS07 (Redelings & Suchard, 2007). The calibration of the divergence times was performed as described in methods and to calculate the branching times the method RelTime was applied. Only positions with more than 95% site coverage were considered for the analysis, which in this case corresponds to 9 residues. The tree construction was performed with MEGA 6.0. The bootstrap consensus tree obtained in Mega 6.0 was very similar to that calculated by the joint estimation of Bali-phy.

**Figure 8-Table 1**

Key for the input sequences used in the phylogenetic analysis

|                  |       |                           |                                  |
|------------------|-------|---------------------------|----------------------------------|
| sp Q1LYB6 ATF1B  | DANRE | ATIF1                     | <i>Danio rerio</i>               |
| sp A3KNL5 ATF1A  | DANRE | ATIF1                     | <i>Danio rerio</i>               |
| sp P01096 ATIF1  | BOVIN | ATIF1                     | <i>Bos Taurus</i>                |
| sp P37209 ATIF1  | CAEEL | ATIF1                     | <i>Caenorhabditis elegans</i>    |
| sp Q9UII2 ATIF1  | HUMAN | ATIF1                     | <i>Homo sapiens</i>              |
| sp Q5RFJ9 ATIF1  | PONAB | ATIF1                     | <i>Pongo abelii</i>              |
| sp A8XZB0 ATIF2  | CAEBR | ATIF1                     | <i>Caenorhabditis briggsae</i>   |
| sp O74523 ATIF   | SCHPO | ATIF1                     | <i>Schizosaccharomyces pombe</i> |
| sp Q03344 ATIF1  | RAT   | ATIF1                     | <i>Rattus norvegicus</i>         |
| sp F7BK26 ATIF1  | XENTR | ATIF1                     | <i>Xenopus tropicalis</i>        |
| sp Q29307 ATIF1  | PIG   | ATIF1                     | <i>Sus scrofa</i>                |
| sp O35143 ATIF1  | MOUSE | ATIF1                     | <i>Mus musculus</i>              |
| sp P01098 STF1   | YEAST | Putative ATPase inhibitor | <i>Saccharomyces cerevisiae</i>  |
| tr Q6CL59 Q6CL59 | KLULA | Putative ATPase inhibitor | <i>Kluyveromyces lactis</i>      |
| tr Q0U9C9 Q0U9C9 | PHANO | Putative ATPase inhibitor | <i>Phaeosphaeria nodorum</i>     |
| tr Q75A18 Q75A18 | ASHGO | Putative ATPase inhibitor | <i>Ashbya gossypii</i>           |
| tr Q0C9S3 Q0C9S3 | ASPTN | Putative ATPase inhibitor | <i>Aspergillus terreus</i>       |
| tr Q6FP60 Q6FP60 | CANGA | Putative ATPase inhibitor | <i>Candida glabrata</i>          |
| tr Q6CCY1 Q6CCY1 | YARLI | Putative ATPase inhibitor | <i>Yarrowia lipolytica</i>       |
| tr Q2U6F6 Q2U6F6 | ASPOR | Putative ATPase inhibitor | <i>Aspergillus oryzae</i>        |
| tr Q86DY6 Q86DY6 | SCHJA | Putative ATPase inhibitor | <i>Schistosoma japonicum</i>     |
| tr A0FDQ6 A0FDQ6 | BOMMO | ATIF1                     | <i>Bombyx mori</i>               |
| tr Q17D81 Q17D81 | AEDAE | Putative ATPase inhibitor | <i>Aedes aegypti</i>             |
| tr B5X591 B5X591 | SALSA | ATIF1                     | <i>Salmo salar</i>               |
| tr C1BWJ3 C1BWJ3 | ESOLU | ATIF1                     | <i>Esox Lucius</i>               |
| tr C3KHS5 C3KHS5 | ANOFI | ATIF1                     | <i>Anoplopoma fimbria</i>        |
| tr C1BK85 C1BK85 | OSMMO | ATIF1                     | <i>Osmerus mordax</i>            |
| tr Q6DJL4 Q6DJL4 | XENLA | atpif1                    | <i>Xenopus laevis</i>            |
| sp Q16611 BAK    | HUMAN | BAK1                      | <i>Homo sapiens</i>              |
| tr Q91WX5 Q91WX5 | MOUSE | Bak1                      | <i>Mus musculus</i>              |
| sp O08734 BAK    | MOUSE | Bak1                      | <i>Mus musculus</i>              |
| sp Q07816 B2CL1  | CHICK | BCL2L1                    | <i>Gallus gallus</i>             |
| tr Q9JK59 Q9JK59 | RAT   | Bak1                      | <i>Rattus norvegicus</i>         |
| sp O77737 B2CL1  | PIG   | BCL2L1                    | <i>Sus scrofa</i>                |
| sp Q07817 B2CL1  | HUMAN | BCL2L1                    | <i>Homo sapiens</i>              |
| tr Q7TS62 Q7TS62 | RAT   | Bcl2l1                    | <i>Rattus norvegicus</i>         |
| sp P53563 B2CL1  | RAT   | Bcl2l1                    | <i>Rattus norvegicus</i>         |
| sp Q64373 B2CL1  | MOUSE | Bcl2l1                    | <i>Mus musculus</i>              |
| tr A2AHX9 A2AHX9 | MOUSE | Bcl2l1                    | <i>Mus musculus</i>              |
| tr Q9QWX2 Q9QWX2 | MOUSE | Bcl2l1                    | <i>Mus musculus</i>              |
| sp P70345 B2CL2  | MOUSE | Bcl2l2                    | <i>Mus musculus</i>              |

|                  |       |         |                                  |
|------------------|-------|---------|----------------------------------|
| sp Q1RMX3 B2CL2  | BOVIN | BCL2L2  | <i>Bos Taurus</i>                |
| sp Q45T69 B2CL2  | CANFA | BCL2L2  | <i>Canis familiaris</i>          |
| sp Q92843 B2CL2  | HUMAN | BCL2L2  | <i>Homo sapiens</i>              |
| sp Q00709 BCL2   | CHICK | BCL2    | <i>Gallus gallus</i>             |
| sp O02718 BCL2   | BOVIN | BCL2    | <i>Bos Taurus</i>                |
| sp Q6R755 BCL2   | CANFA | BCL2    | <i>Canis familiaris</i>          |
| sp P49950 BCL2   | RAT   | Bcl2    | <i>Rattus norvegicus</i>         |
| sp P10417 BCL2   | MOUSE | Bcl2    | <i>Mus musculus</i>              |
| sp Q9JJV8 BCL2   | CRIGR | BCL2    | <i>Cricetulus griseus</i>        |
| sp P10415 BCL2   | HUMAN | BCL2    | <i>Homo sapiens</i>              |
| tr G8GLM0 G8GLM0 | CAVPO | BCL2    | <i>Cavia porcellus</i>           |
| sp O43521 B2L11  | HUMAN | BCL2L11 | <i>Homo sapiens</i>              |
| sp O88498 B2L11  | RAT   | Bcl2l11 | <i>Rattus norvegicus</i>         |
| sp O54918 B2L11  | MOUSE | Bcl2l11 | <i>Mus musculus</i>              |
| sp P59017 B2L13  | MOUSE | Bcl2l13 | <i>Mus musculus</i>              |
| sp Q9B XK5 B2L13 | HUMAN | BCL2L13 | <i>Homo sapiens</i>              |
| sp Q92934 BAD    | HUMAN | BAD     | <i>Homo sapiens</i>              |
| sp Q61337 BAD    | MOUSE | Bad     | <i>Mus musculus</i>              |
| sp O35147 BAD    | RAT   | Bad     | <i>Rattus norvegicus</i>         |
| sp P48558 BXI1   | YEAST | Bax     | <i>Saccharomyces cerevisiae</i>  |
| sp O74888 BXI1   | SCHPO | Bax     | <i>Schizosaccharomyces pombe</i> |
| sp Q9Z0F3 B2L10  | MOUSE | Bcl2l10 | <i>Mus musculus</i>              |
| sp Q9BXH1 BBC3   | HUMAN | BBC3    | <i>Homo sapiens</i>              |
| sp Q80ZG6 BBC3   | RAT   | Bbc3    | <i>Rattus norvegicus</i>         |
| sp Q99ML1 BBC3   | MOUSE | Bbc3    | <i>Mus musculus</i>              |
| sp Q13323 BIK    | HUMAN | BIK     | <i>Homo sapiens</i>              |
| sp O70337 BIK    | MOUSE | Bik     | <i>Mus musculus</i>              |
| sp Q07813 BAX    | MOUSE | BAX     | <i>Mus musculus</i>              |
| tr G5BAG6 G5BAG6 | HETGA | BAX     | <i>Heterocephalus glaber</i>     |
| sp Q07812 BAX    | HUMAN | BAX     | <i>Homo sapiens</i>              |
| sp O02703 BAX    | BOVIN | BAX     | <i>Bos Taurus</i>                |
| tr Q8SQ43 Q8SQ43 | FELCA | BAX     | <i>Felis catus</i>               |
| sp O00198 HRK    | HUMAN | HRK     | <i>Homo sapiens</i>              |
| sp P97287 MCL1   | MOUSE | Mcl1    | <i>Mus musculus</i>              |
| sp Q9Z1P3 MCL1   | RAT   | Mcl1    | <i>Rattus norvegicus</i>         |
| sp Q07820 MCL1   | HUMAN | MCL1    | <i>Homo sapiens</i>              |
| sp Q7YRZ9 MCL1   | FELCA | MCL1    | <i>Felis catus</i>               |
| sp Q8HYS5 MCL1   | CANFA | MCL1    | <i>Canis familiaris</i>          |
| tr Q1LX52 Q1LX52 | DANRE | BID     | <i>Danio rerio</i>               |
| tr Q56VD1 Q56VD1 | XENLA | BID     | <i>Xenopus laevis</i>            |
| tr A0SZK2 A0SZK2 | XENTR | BID     | <i>Xenopus tropicalis</i>        |
| tr V8P747 V8P747 | OPHHA | BID     | <i>Ophiophagus hannah</i>        |
| sp Q8JGM8 BID    | CHICK | BID     | <i>Gallus gallus</i>             |
| tr U6D381 U6D381 | NEOVI | BID     | <i>Neovison vison</i>            |
| sp Q4JHS0 BID    | PIG   | BID     | <i>Sus scrofa</i>                |

|                  |       |          |                            |
|------------------|-------|----------|----------------------------|
| tr Q05KI6 Q05KI6 | BOVIN | BID      | <i>Bos Taurus</i>          |
| tr Q17QH5 Q17QH5 | BOVIN | BID      | <i>Bos Taurus</i>          |
| sp P70444 BID    | MOUSE | BID      | <i>Mus musculus</i>        |
| sp Q9JLT6 BID    | RAT   | BID      | <i>Rattus norvegicus</i>   |
| tr A8ASI9 A8ASI9 | RAT   | BID      | <i>Rattus norvegicus</i>   |
| tr E2IV85 E2IV85 | FELCA | BID      | <i>Felis catus</i>         |
| tr E2IV86 E2IV86 | LEMCA | BID      | <i>Lemur catta</i>         |
| tr B2ZP78 B2ZP78 | HUMAN | BID      | <i>Homo sapiens</i>        |
| sp P55957 BID    | HUMAN | BID      | <i>Homo sapiens</i>        |
| tr A8ASI8 A8ASI8 | HUMAN | BID      | <i>Homo sapiens</i>        |
| tr E2IV87 E2IV87 | 9PRIM | BID      | <i>Saimiri boliviensis</i> |
| tr E2IV84 E2IV84 | AOTVO | BID      | <i>Aotus vociferans</i>    |
| sp Q6GP52 BECN1  | XENLA | Beclin-1 | <i>Xenopus laevis</i>      |
| sp Q4A1L3 BECN1  | XENTR | Beclin-1 | <i>Xenopus tropicalis</i>  |
| sp Q5ZKS6 BECN1  | CHICK | Beclin-1 | <i>Gallus gallus</i>       |
| sp Q14457 BECN1  | HUMAN | Beclin-1 | <i>Homo sapiens</i>        |
| sp Q5R878 BECN1  | PONAB | Beclin-1 | <i>Pongo abelii</i>        |
| sp Q91XJ1 BECN1  | RAT   | Beclin-1 | <i>Rattus norvegicus</i>   |
| sp O88597 BECN1  | MOUSE | Beclin-1 | <i>Mus musculus</i>        |
| sp Q4A1L5 BECN1  | PIG   | Beclin-1 | <i>Sus scrofa</i>          |
| sp Q4A1L4 BECN1  | BOVIN | Beclin-1 | <i>Bos Taurus</i>          |

## Supplemental references

- Aon MA, Cortassa S, Wei AC, Grunnet M, O'Rourke B (2010) Energetic performance is improved by specific activation of K<sup>+</sup> fluxes through K(Ca) channels in heart mitochondria. *Biochim Biophys Acta* **1797**: 71-80
- Foster DB, Ho AS, Rucker J, Garlid AO, Chen L, Sidor A, Garlid KD, O'Rourke B (2012) Mitochondrial ROMK channel is a molecular component of mitoK(ATP). *Circ Res* **111**: 446-454
- Garlid KD, DiResta DJ, Beavis AD, Martin WH (1986) On the mechanism by which dicyclohexylcarbodiimide and quinine inhibit K<sup>+</sup> transport in rat liver mitochondria. *J Biol Chem* **261**: 1529-1535
- Le SQ, Gascuel O (2008) An improved general amino acid replacement matrix. *Mol Biol Evol* **25**: 1307-1320
- Martin WH, DiResta DJ, Garlid KD (1986) Kinetics of inhibition and binding of dicyclohexylcarbodiimide to the 82,000-dalton mitochondrial K<sup>+</sup>/H<sup>+</sup> antiporter. *J Biol Chem* **261**: 12300-12305
- Redelings BD, Suchard MA (2007) Incorporating indel information into phylogeny estimation for rapidly emerging pathogens. *BMC Evol Biol* **7**: 40
- Saitou N, Nei M (1987) The neighbor-joining method: a new method for reconstructing phylogenetic trees. *Mol Biol Evol* **4**: 406-425
- Tamura K, Battistuzzi FU, Billings-Ross P, Murillo O, Filipowski A, Kumar S (2012) Estimating divergence times in large molecular phylogenies. *Proc Natl Acad Sci U S A* **109**: 19333-19338
- Tamura K, Stecher G, Peterson D, Filipowski A, Kumar S (2013) MEGA6: Molecular Evolutionary Genetics Analysis version 6.0. *Mol Biol Evol* **30**: 2725-2729
